# Supplementary material for: Poly(imidazolyliden-yl)borato Complexes of Tungsten: Mapping Steric vs. Electronic Features of Facially Coordinating Ligands
Source: MDPI journal article supplement (doi:10.3390/molecules28237761), 2023-11-24

## Supporting Information

# **Poly(imidazolyli-den-yl)borato Complexes of Tungsten: Map-ping Steric vs. Electronic Features of Facially Coordinating Ligands**

Callum M. Inglis, Richard A. Manzano, Ryan M. Kirk, Manab Sharma, Madeleine D. Stewart, Lachlan J. Watson and Anthony F. Hill \*

The following supporting information comprise characterisational spectra for new compounds reported in the associated manuscript.

CCDC 2305467 and 2305468 contain the supplementary crystallographic data for this paper and are available free of charge from the Cambridge Crystallographic Data Centre.

**<sup>1</sup>H NMR Spectrum of [HB(ImMe)<sub>3</sub>](PF<sub>6</sub>)<sub>2</sub> ([1](PF<sub>6</sub>)<sub>2</sub>) (400 MHz, CD<sub>3</sub>CN, 25°C, δ)**

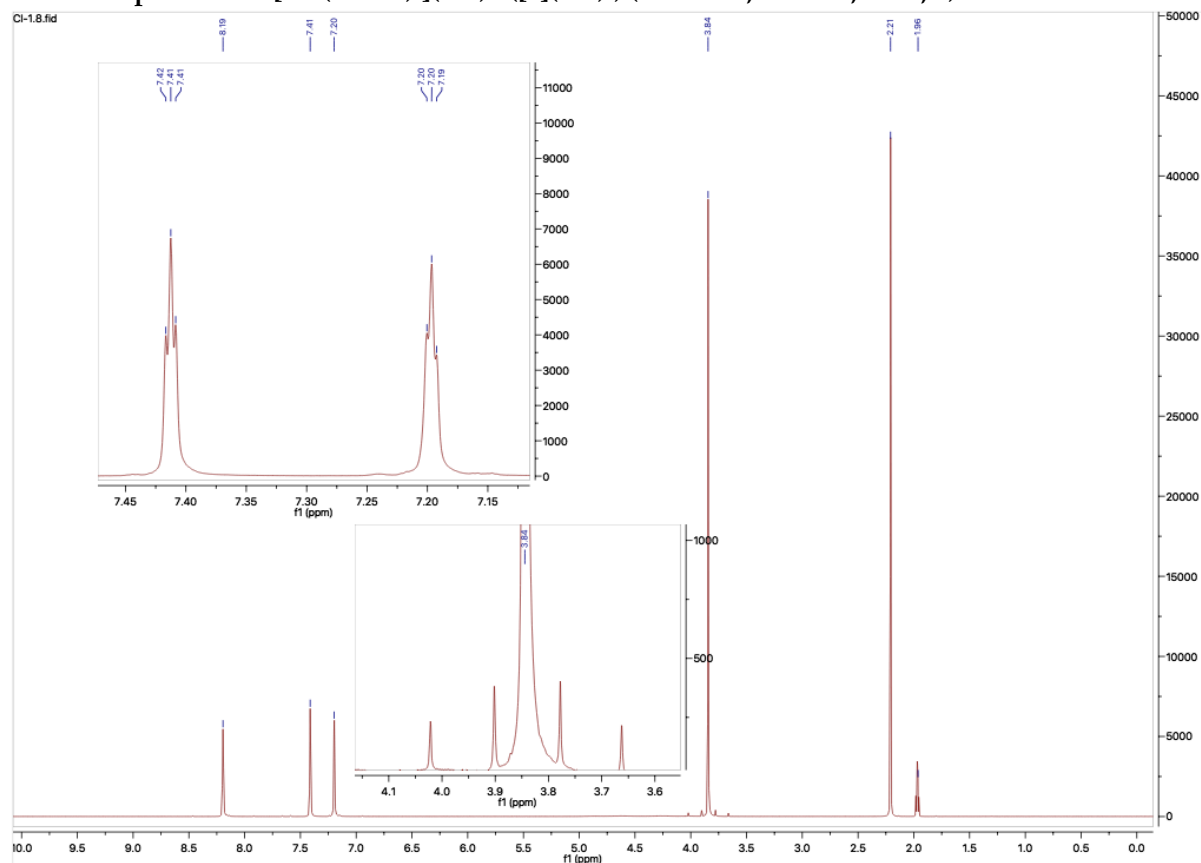<sup>13</sup>C{<sup>1</sup>H} NMR spectrum of ([1](PF<sub>6</sub>)<sub>2</sub>) (101 MHz, CD<sub>3</sub>CN, 25°C, δ)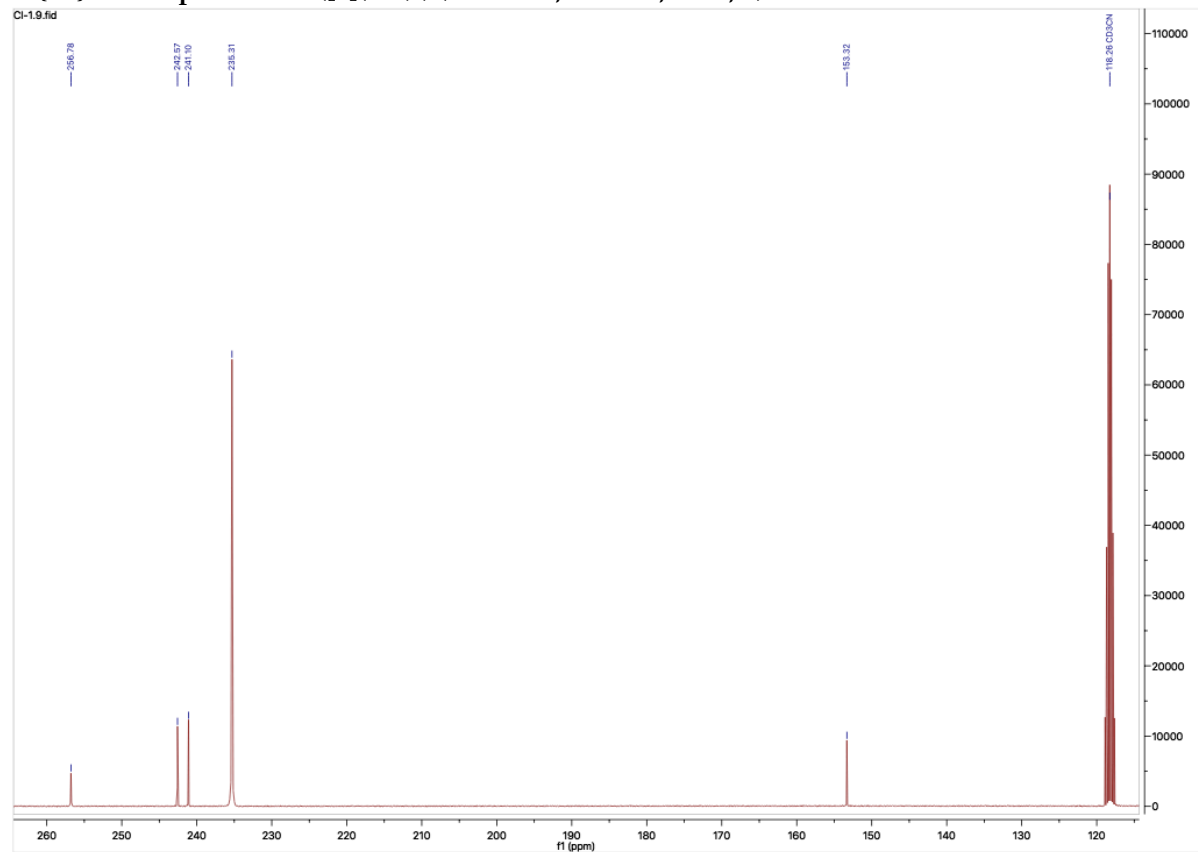

$^{11}\text{B}\{^1\text{H}\}$  NMR spectrum of  $([\text{I}](\text{PF}_6)_2)$  (128.4 MHz,  $\text{CD}_3\text{CN}$ ,  $25^\circ\text{C}$ ,  $\delta$ )

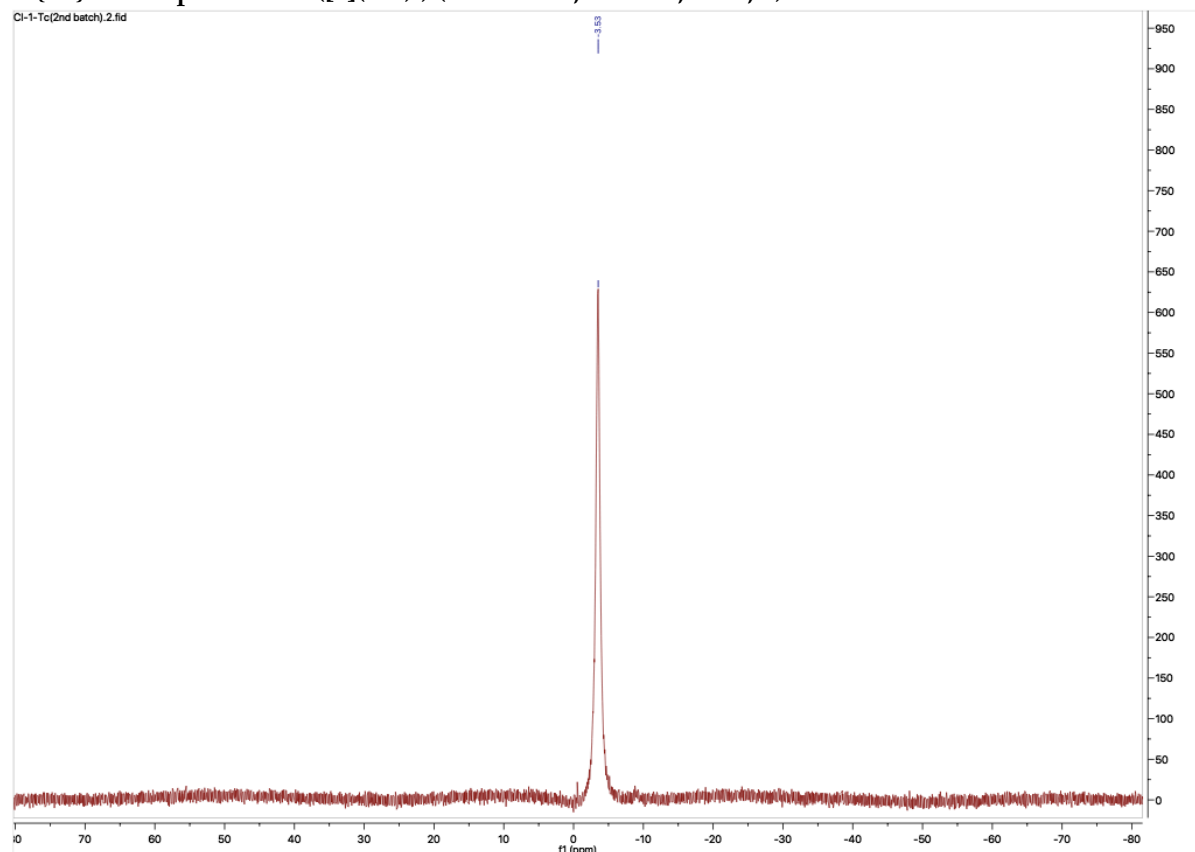

$^{11}\text{B}$  NMR spectrum of  $([\text{I}](\text{PF}_6)_2)$  (128.4 MHz,  $\text{CD}_3\text{CN}$ ,  $25^\circ\text{C}$ ,  $\delta$ )

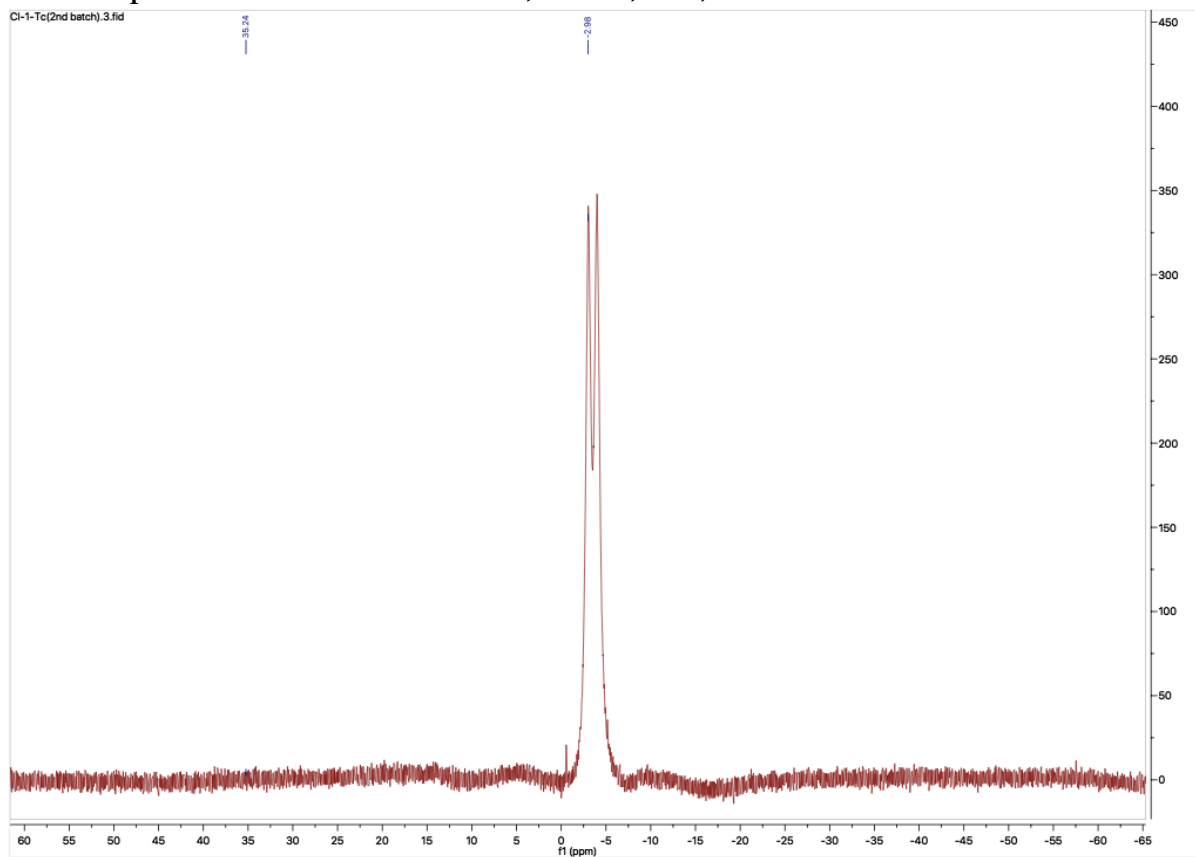

## ATR Infrared Spectrum of [1](PF<sub>6</sub>)<sub>2</sub> (Inset = CH<sub>2</sub>Cl<sub>2</sub> solution spectrum, ν<sub>BH</sub> region)

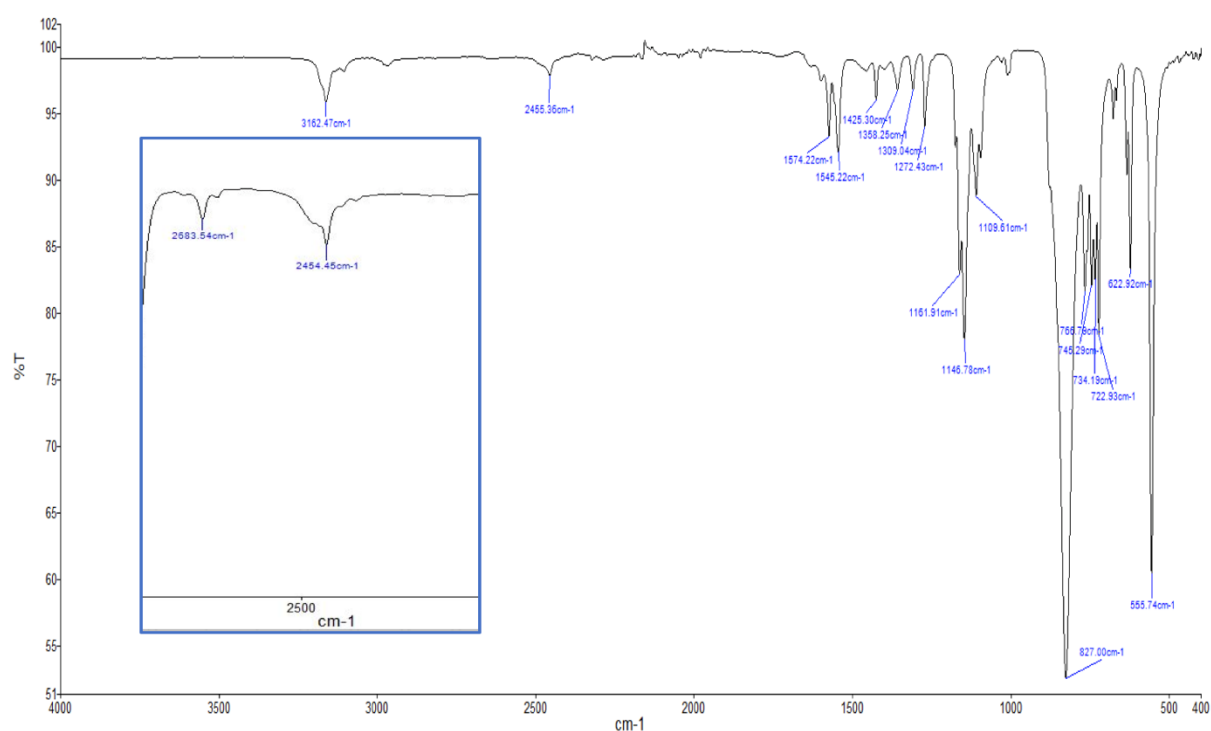

## Mass Spectrometry for [1](PF<sub>6</sub>)<sub>2</sub>

### Elemental Composition Report

Page 1

#### Single Mass Analysis

Tolerance = 3.0 PPM / DBE: min = -1.5, max = 100.0

Element prediction: Off

Number of isotope peaks used for i-FIT = 3

Monoisotopic Mass, Odd and Even Electron Ions

90 formula(e) evaluated with 1 results within limits (up to 50 best isotopic matches for each mass)

Elements Used:

C: 0-50 H: 0-50 11B: 0-2 N: 0-6

Cl-100J

67126

2925A 67 (0.149) Cm (43.169)

1: TOF MS ES+

SYNAPT-G2-Si#NotSet

02-Aug-2022

16:00:42

5.90e+007

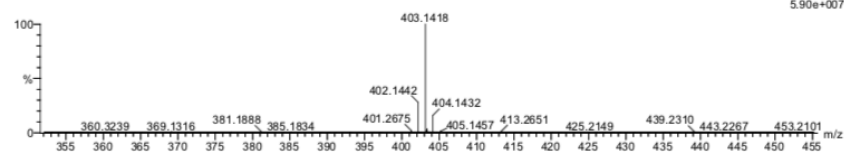

Minimum: -1.5  
Maximum: 5.0 3.0 100.0

| Mass     | Calc. Mass | mDa | PPM | DBE  | i-FIT  | Formula                                            |
|----------|------------|-----|-----|------|--------|----------------------------------------------------|
| 403.1418 | 403.1407   | 1.1 | 2.7 | 23.5 | 4021.6 | C <sub>29</sub> H <sub>16</sub> 11B N <sub>2</sub> |

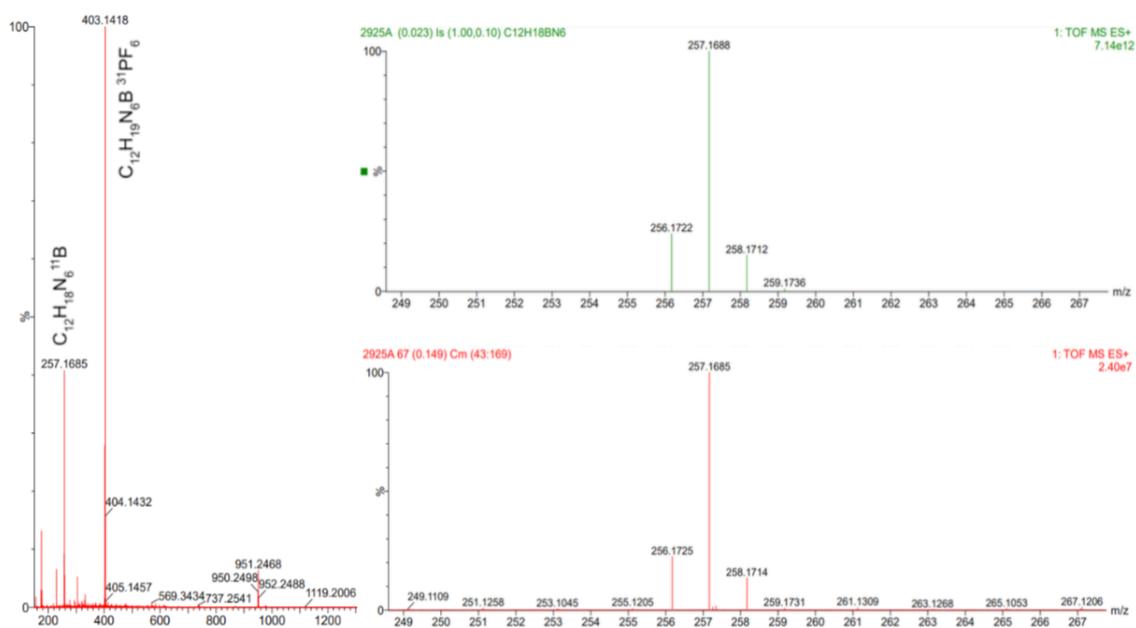

$^1\text{H}$  NMR spectrum of  $[\text{W}(\equiv\text{CC}_6\text{H}_4\text{Me-4})(\text{CO})_2(\text{pic})_2(\text{Br})]$  (2a) (600 MHz,  $\text{CD}_2\text{Cl}_2$ , 298 K)

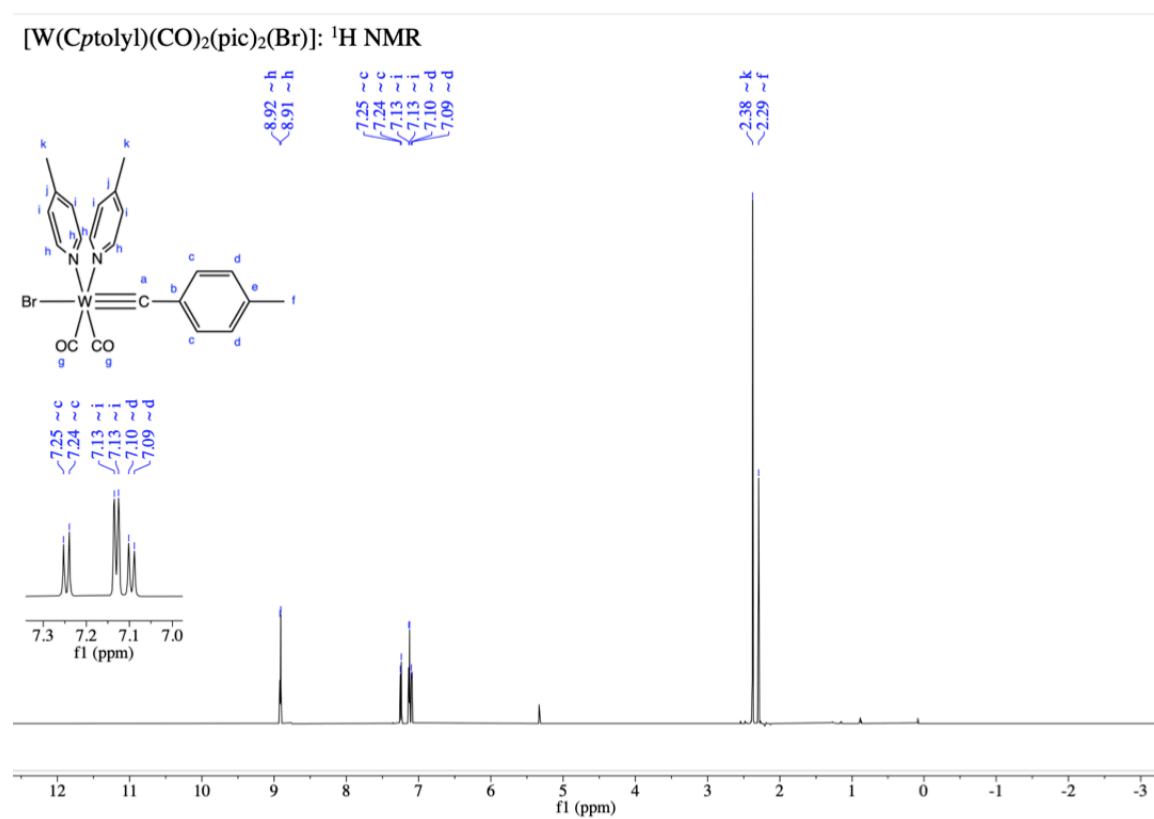

$^{13}\text{C}\{^1\text{H}\}$  NMR spectrum of  $[\text{W}(\equiv\text{CC}_6\text{H}_4\text{Me-4})(\text{CO})_2(\text{pic})_2(\text{Br})]$  (2a) (151 MHz,  $\text{CD}_2\text{Cl}_2$ , 298 K)

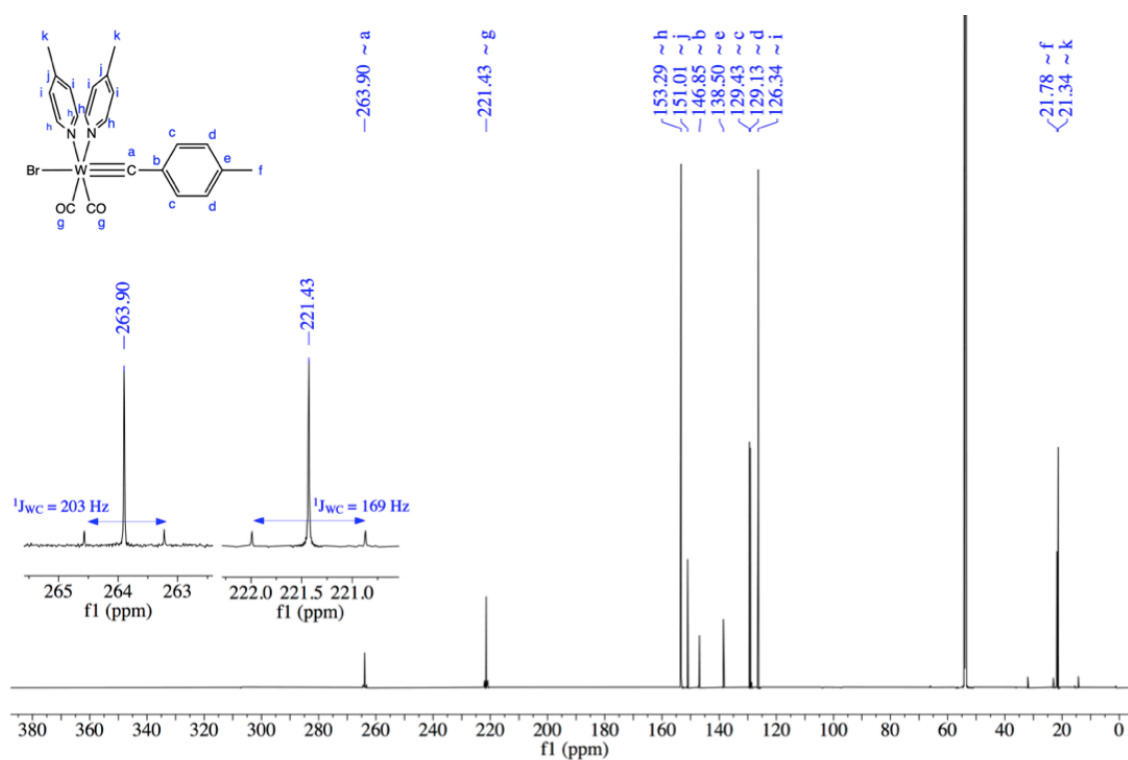

COSY NMR spectrum of  $[\text{W}(\equiv\text{CC}_6\text{H}_4\text{Me-4})(\text{CO})_2(\text{pic})_2(\text{Br})]$  (2a) (600 MHz,  $\text{CD}_2\text{Cl}_2$ , 298 K)

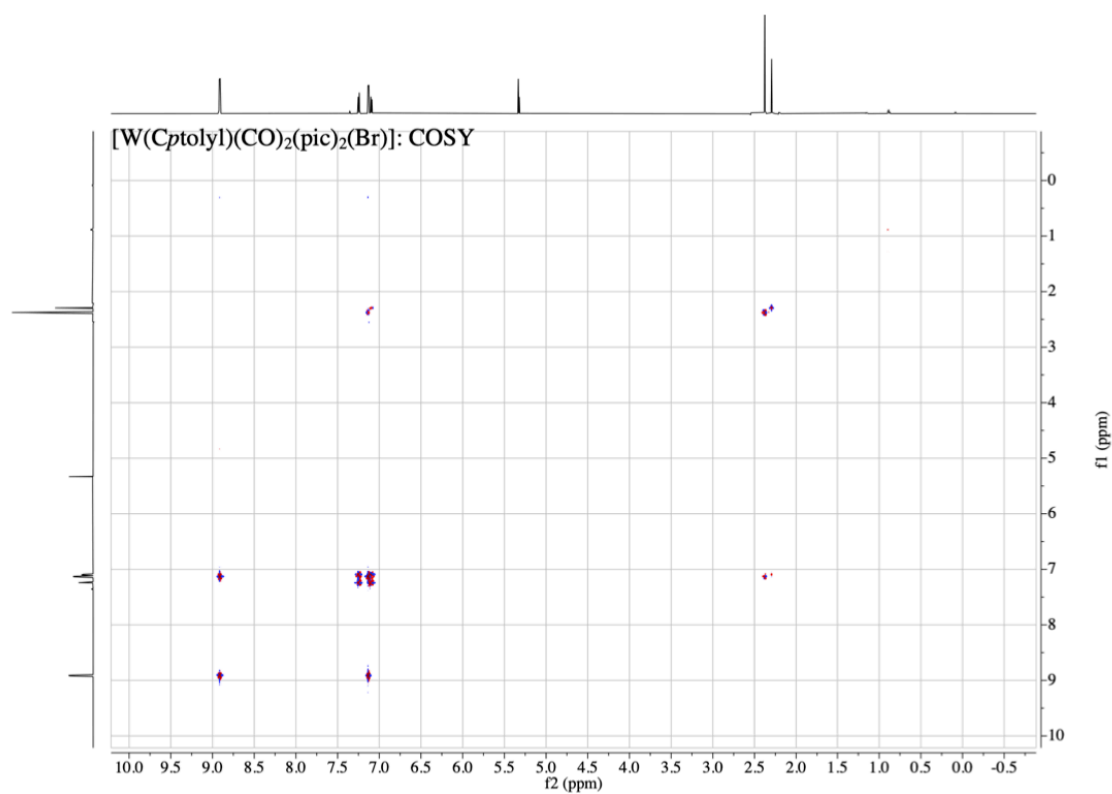

HSQC NMR spectrum of  $[W(\equiv CC_6H_4Me-4)(CO)_2(pic)_2(Br)]$  (2a) (600/151 MHz,  $CD_2Cl_2$ , 298 K)

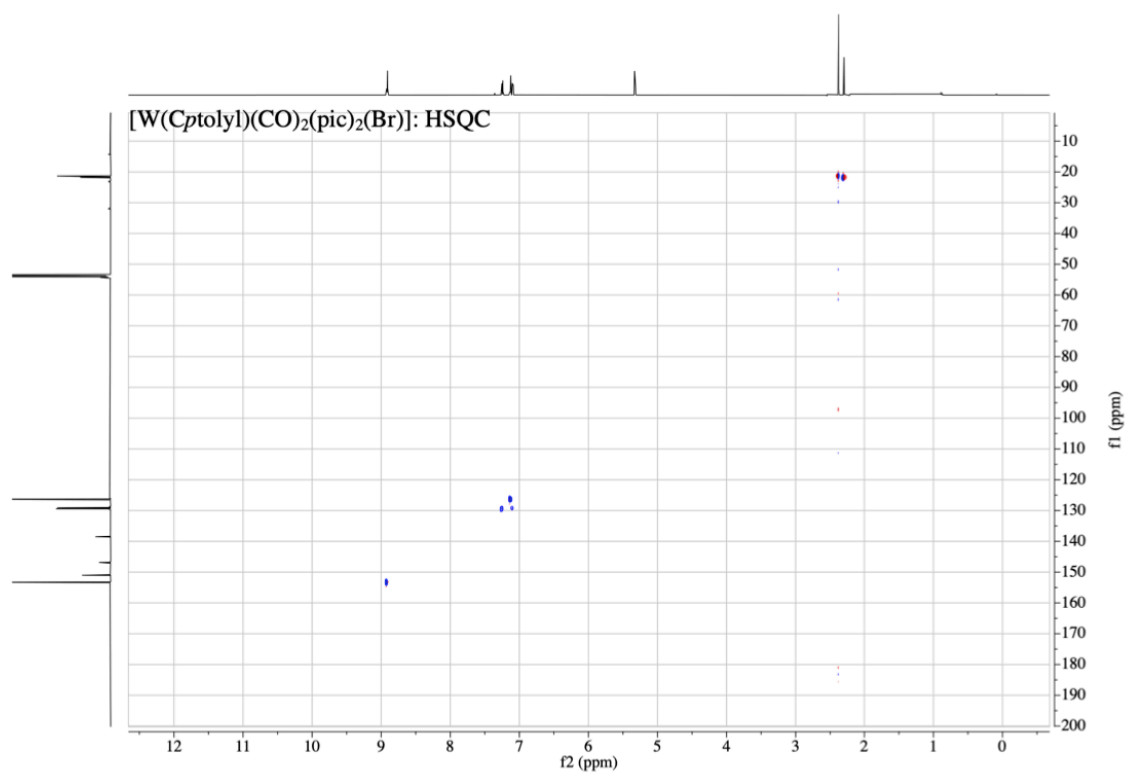

HMBC NMR spectrum of  $[W(\equiv CC_6H_4Me-4)(CO)_2(pic)_2(Br)]$  (2a) (600/151 MHz,  $CD_2Cl_2$ , 298 K)

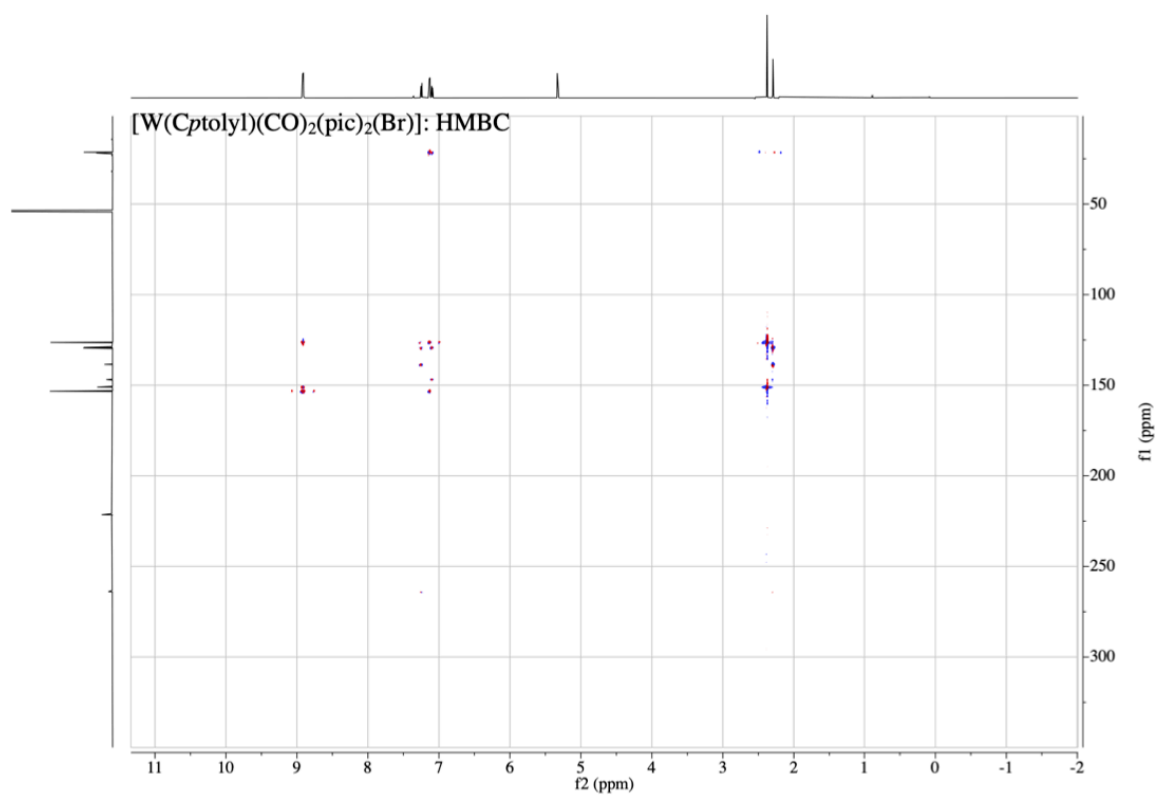

Solution IR spectrum of  $[W(\equiv CC_6H_4Me-4)(CO)_2(pic)_2(Br)]$  (2a) ( $CH_2Cl_2$ ).

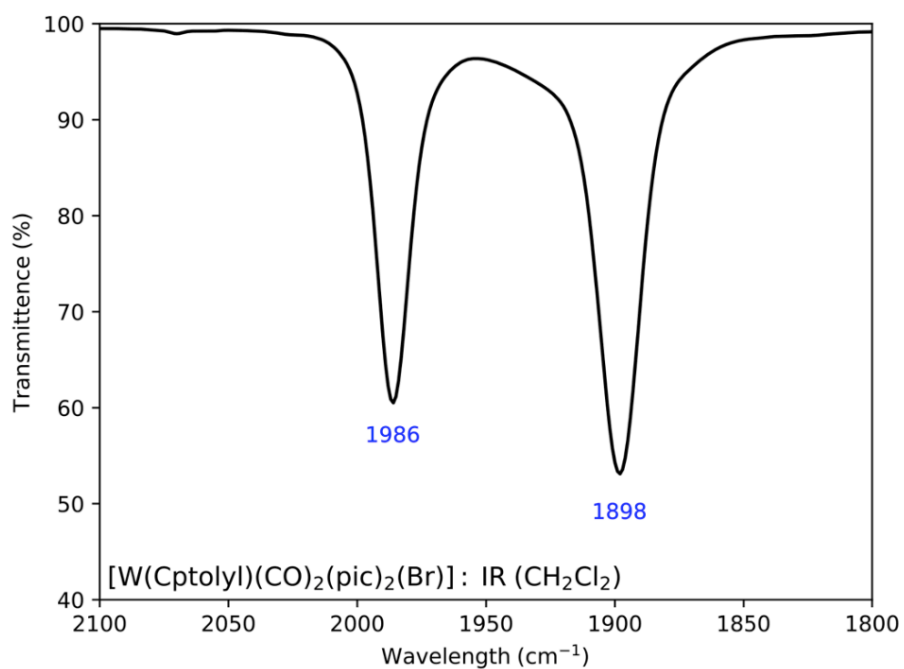

Solid State IR spectrum of  $[W(\equiv CC_6H_4Me-4)(CO)_2(pic)_2(Br)]$  (2a) (ATR).

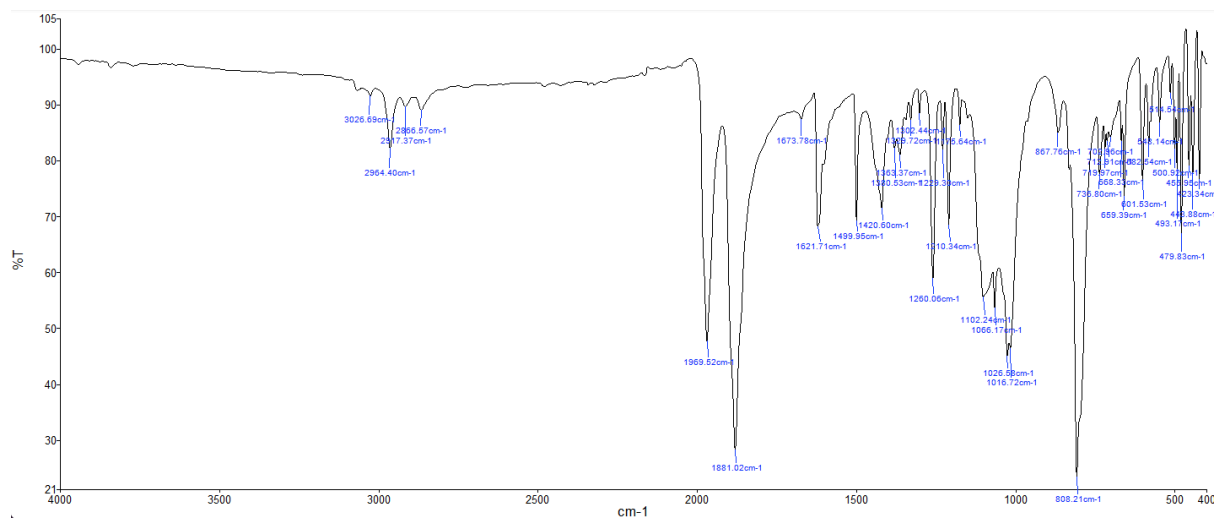



$^1\text{H}$  NMR Spectrum of  $[\text{Mo}(\equiv\text{CC}_6\text{H}_4\text{Me-4})(\text{CO})_2(\text{pic})_2\text{Br}]$  (2b) (800 MHz,  $\text{CD}_2\text{Cl}_2$ , 25 °)

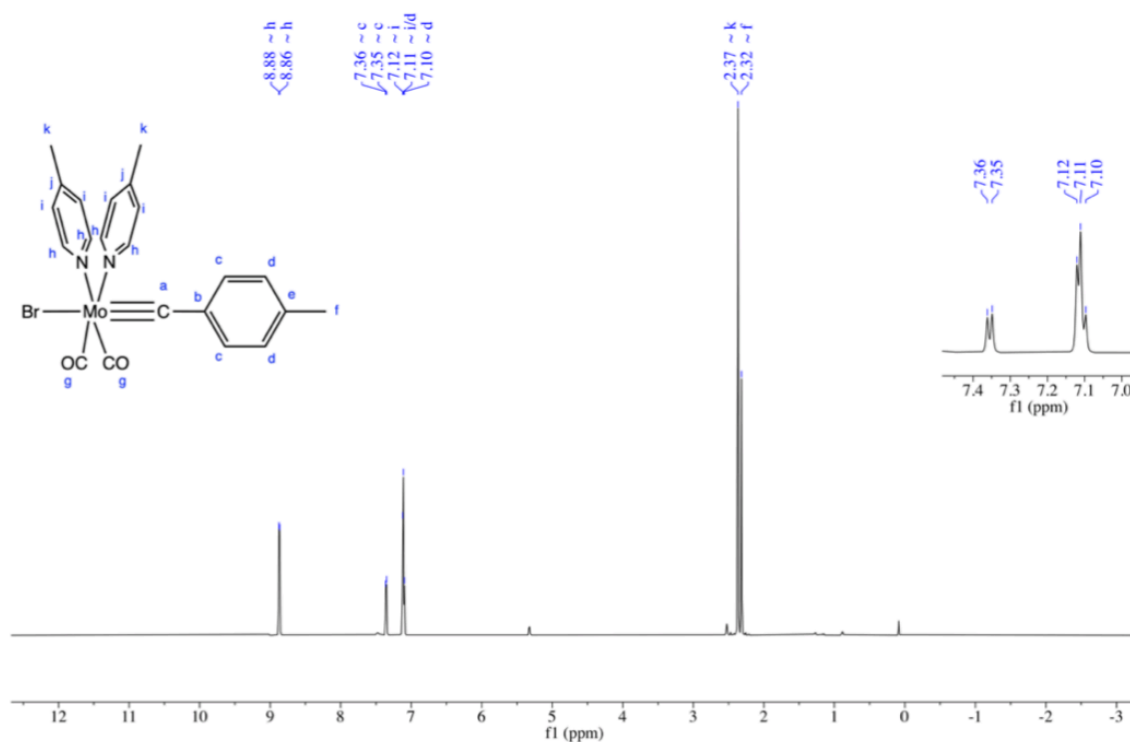

$^{13}\text{C}\{^1\text{H}\}$  NMR Spectrum of  $[\text{Mo}(\equiv\text{CC}_6\text{H}_4\text{Me-4})(\text{CO})_2(\text{pic})_2\text{Br}]$  (2b) (151 MHz,  $\text{CD}_2\text{Cl}_2$ , 25 °)

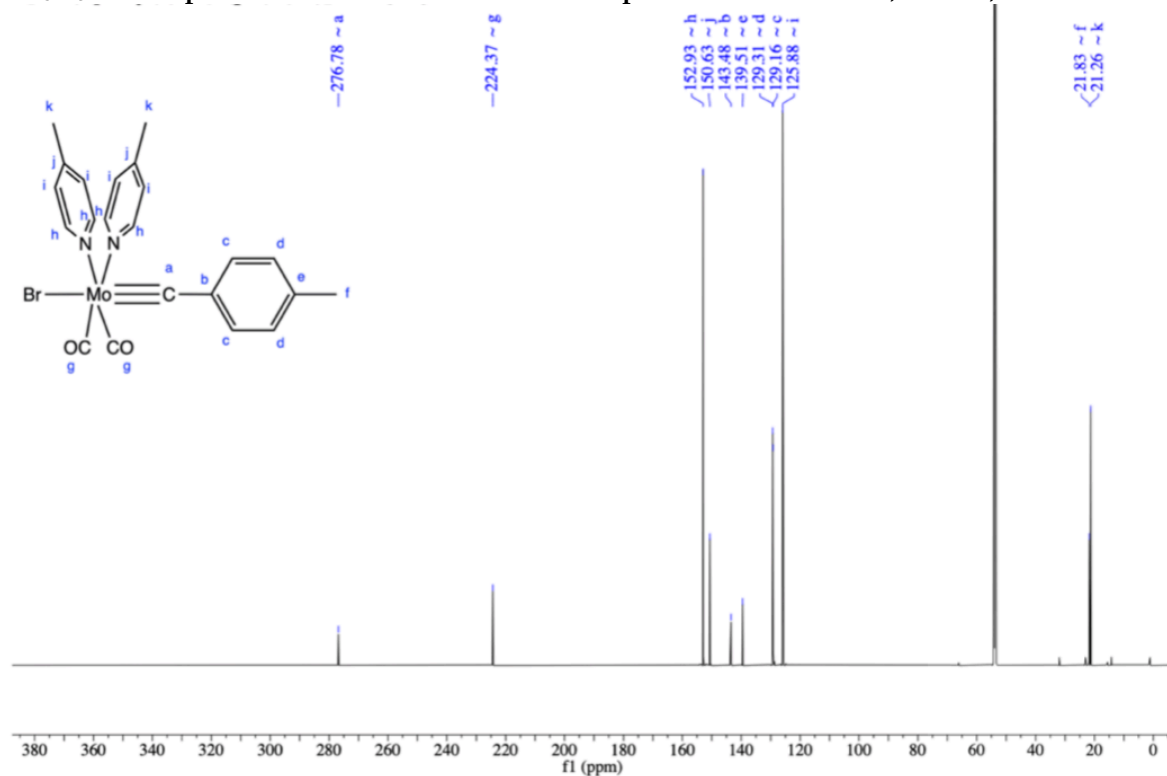

COSY NMR spectrum of  $[\text{Mo}(\equiv\text{CC}_6\text{H}_4\text{Me-4})(\text{CO})_2(\text{pic})_2\text{Br}]$  (2b) (600 MHz,  $\text{CD}_2\text{Cl}_2$ , 298 K).

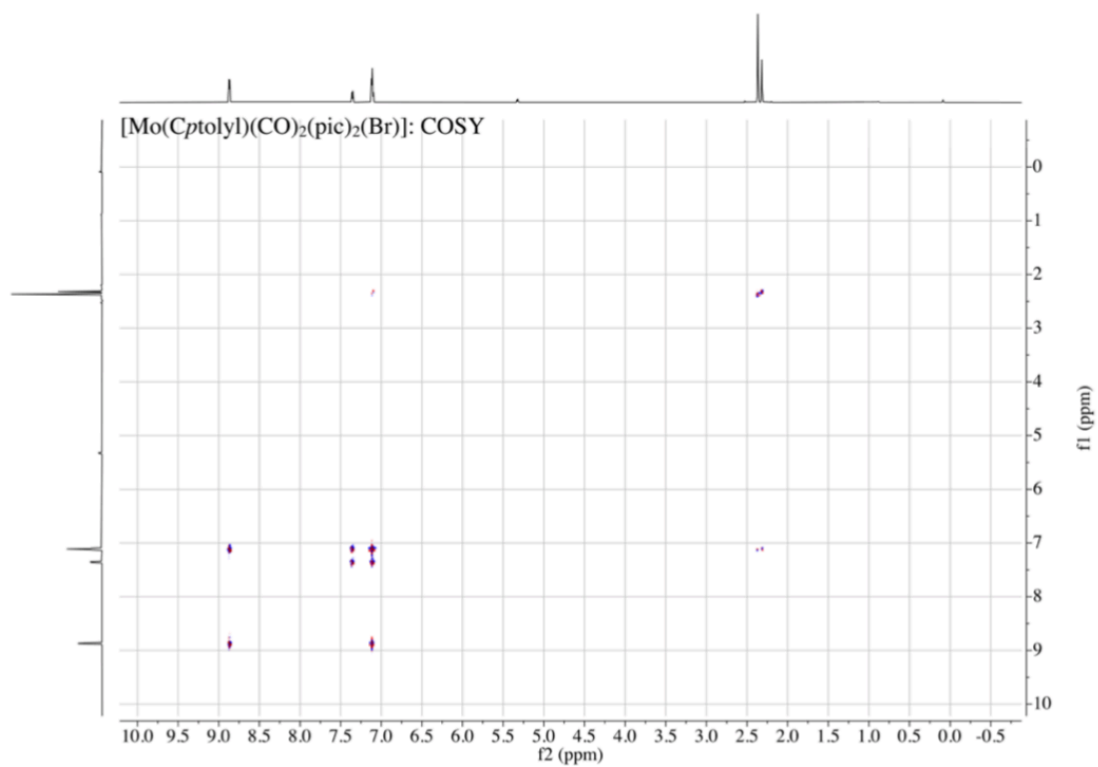

HSQC NMR spectrum of  $[\text{Mo}(\equiv\text{CC}_6\text{H}_4\text{Me-4})(\text{CO})_2(\text{pic})_2\text{Br}]$  (2b) (600/151 MHz,  $\text{CD}_2\text{Cl}_2$ , 298 K)

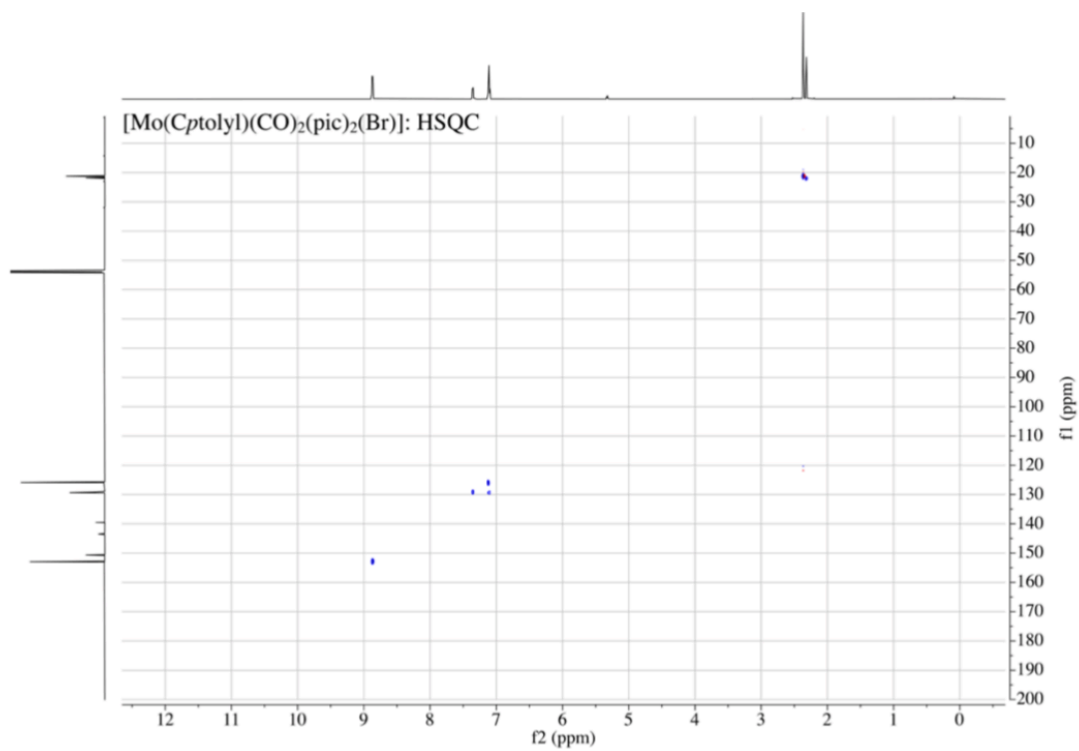

HMBC NMR spectrum of  $[\text{Mo}(\equiv\text{CC}_6\text{H}_4\text{Me-4})(\text{CO})_2(\text{pic})_2\text{Br}]$  (2b) (600/151 MHz,  $\text{CD}_2\text{Cl}_2$ , 298 K)

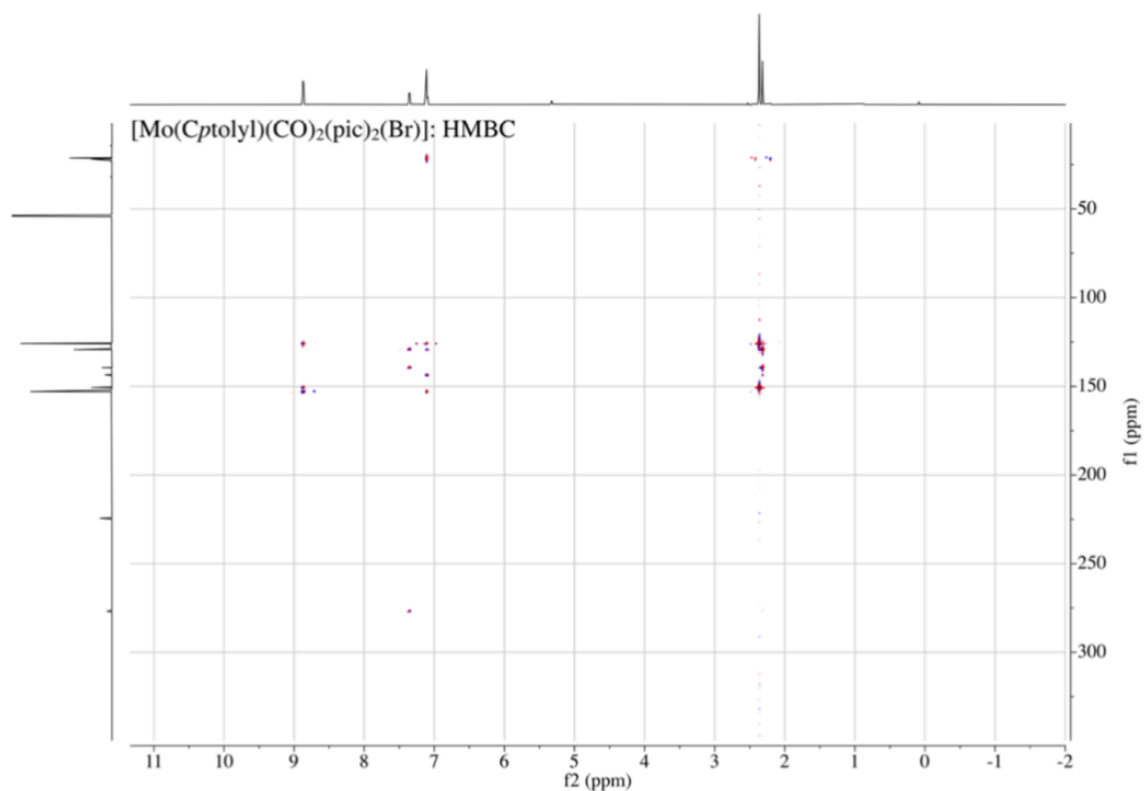

Solution IR spectrum of  $[\text{Mo}(\equiv\text{CC}_6\text{H}_4\text{Me-4})(\text{CO})_2(\text{pic})_2\text{Br}]$  (2b) ( $\text{CH}_2\text{Cl}_2$ ).

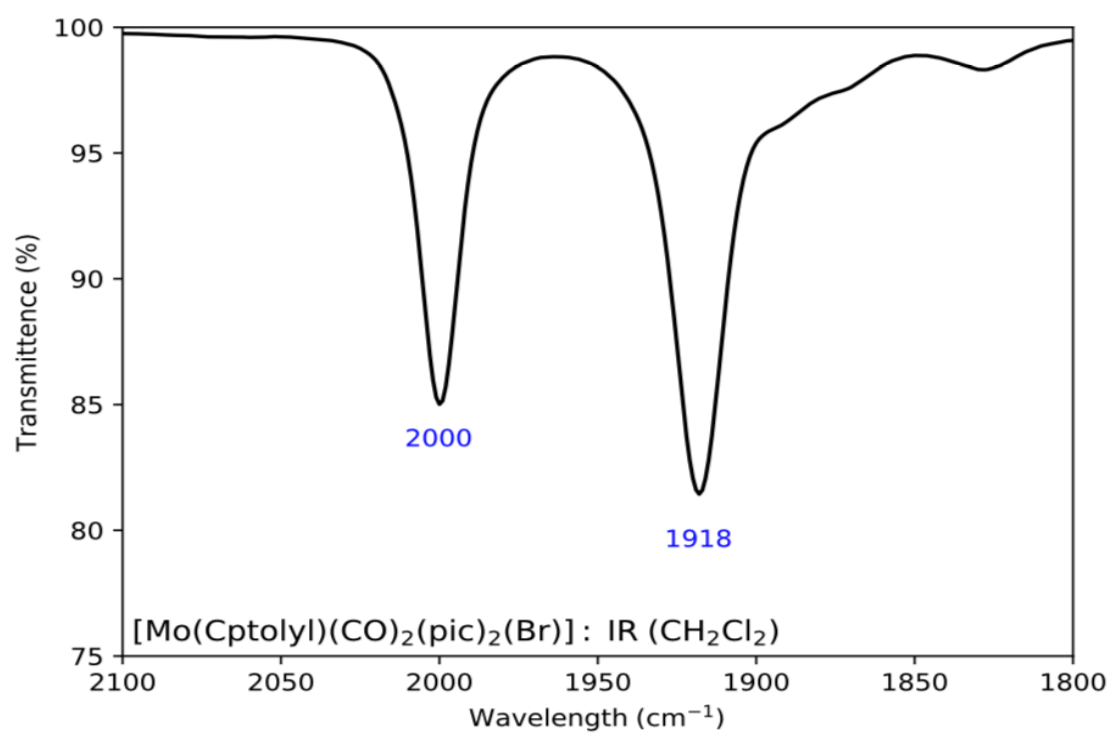

**Solid State IR spectrum of [Mo( $\equiv$ CC<sub>6</sub>H<sub>4</sub>Me-4)(CO)<sub>2</sub>(pic)<sub>2</sub>Br] (2b) (ATR).**

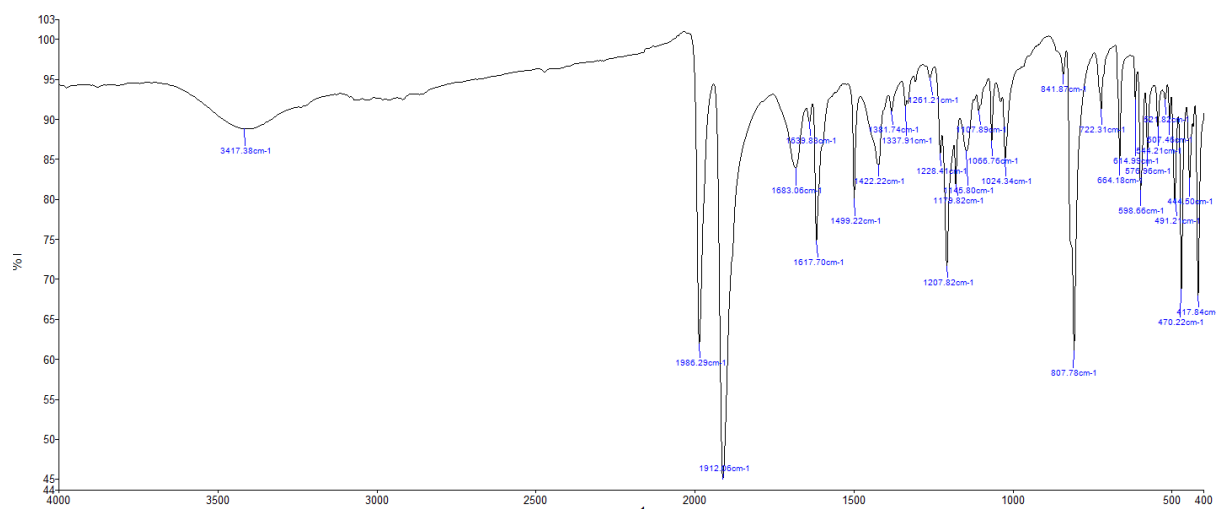

**<sup>1</sup>H NMR Spectrum of [W( $\equiv$ CC<sub>6</sub>H<sub>4</sub>Me-4)(CO)<sub>2</sub>{HB(ImMe)<sub>3</sub>}] (4) (800 MHz, CD<sub>2</sub>Cl<sub>2</sub>, 25 °)**

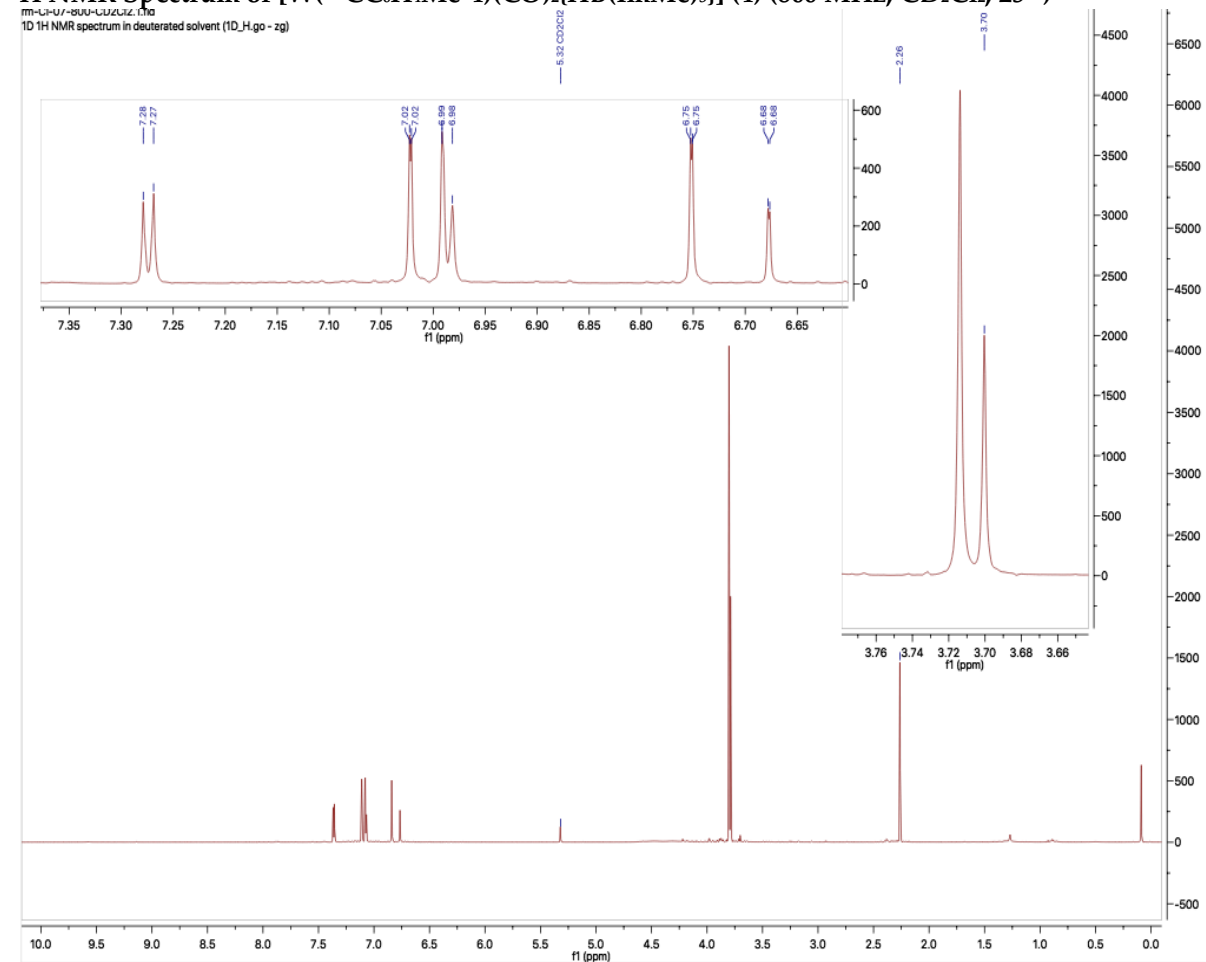

$^{13}\text{C}\{^1\text{H}\}$  NMR Spectrum of  $[\text{W}(\equiv\text{CC}_6\text{H}_4\text{Me-4})(\text{CO})_2\{\text{HB}(\text{ImMe})_3\}]$  (4) (201 MHz,  $\text{CD}_2\text{Cl}_2$ , 25 °)

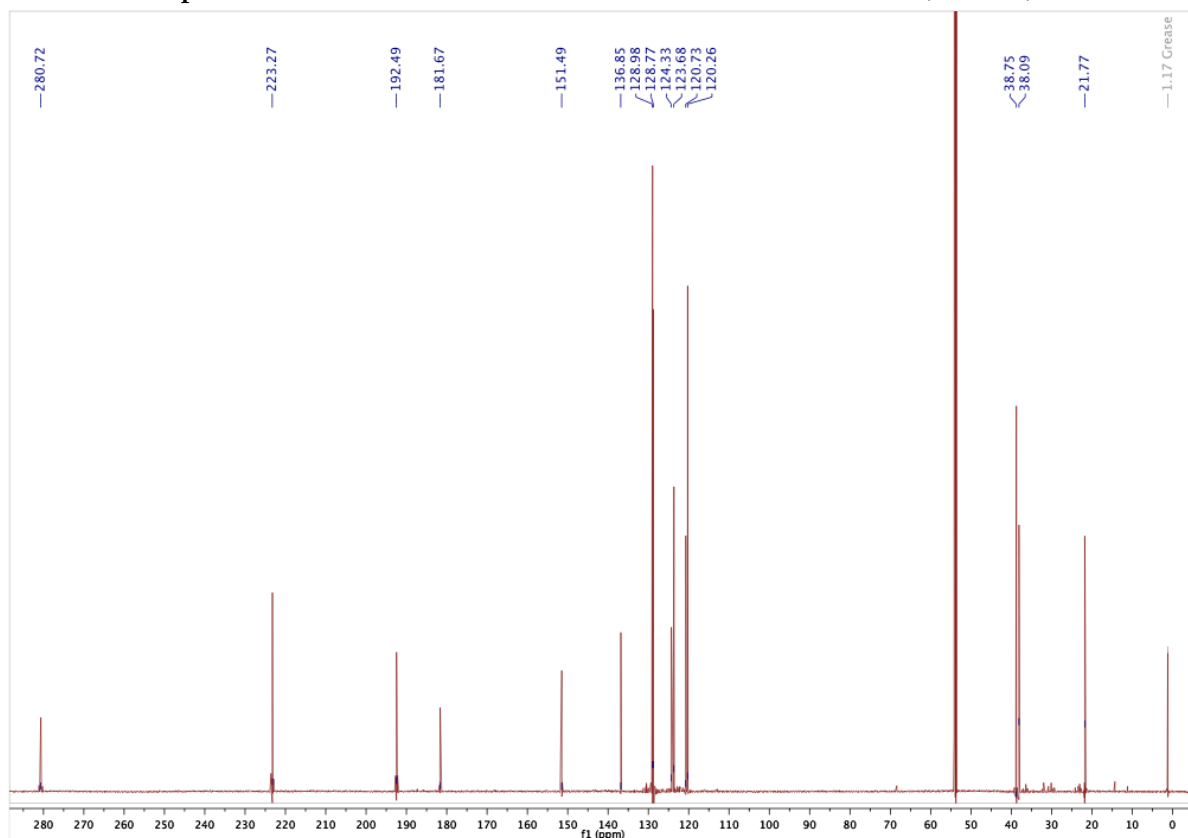

$^{13}\text{C}\{^1\text{H}\}$  NMR Spectrum of  $[\text{W}(\equiv\text{CC}_6\text{H}_4\text{Me-4})(\text{CO})_2\{\text{HB}(\text{ImMe})_3\}]$  (4) (201 MHz,  $\text{CD}_2\text{Cl}_2$ , 25 °) – Low field extracts

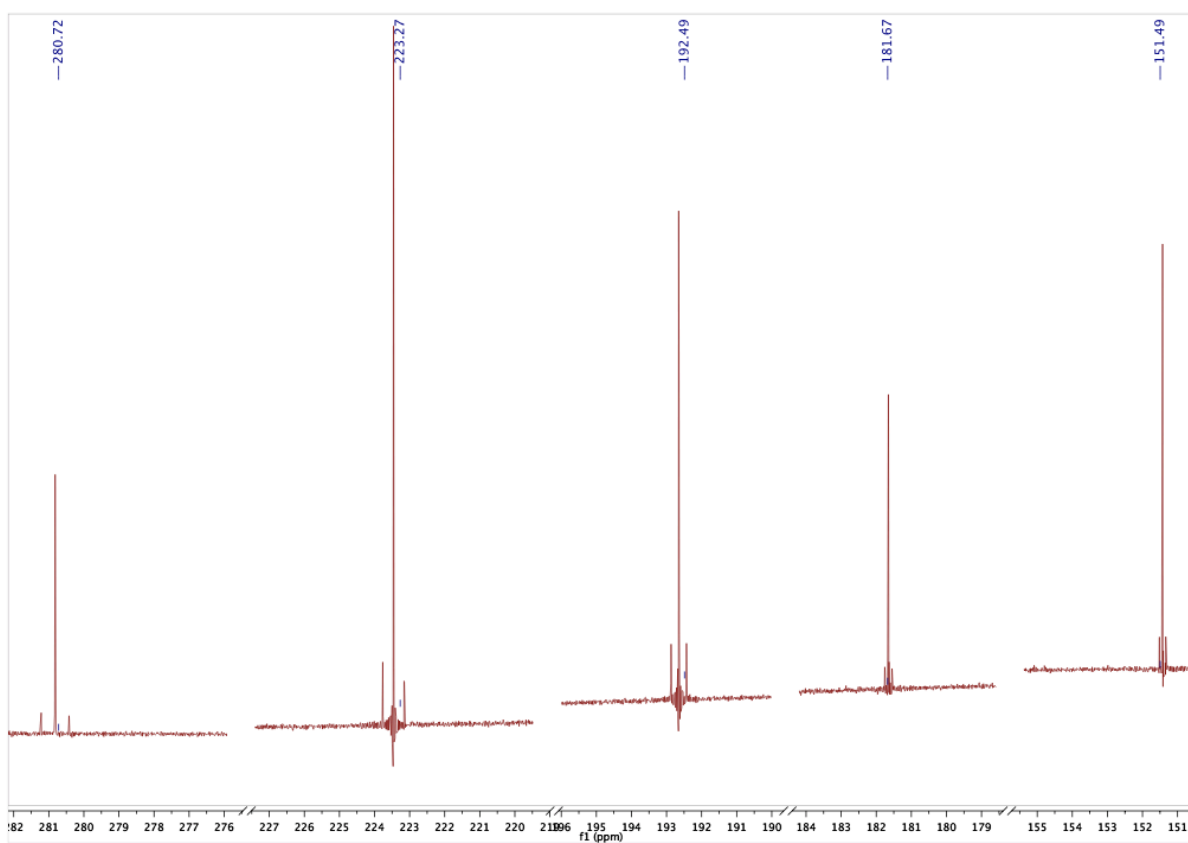

### Solid State IR Spectrum of $[W(\equiv CC_6H_4Me-4)(CO)_2\{HB(ImMe)_3\}]$ (4) (ATR)

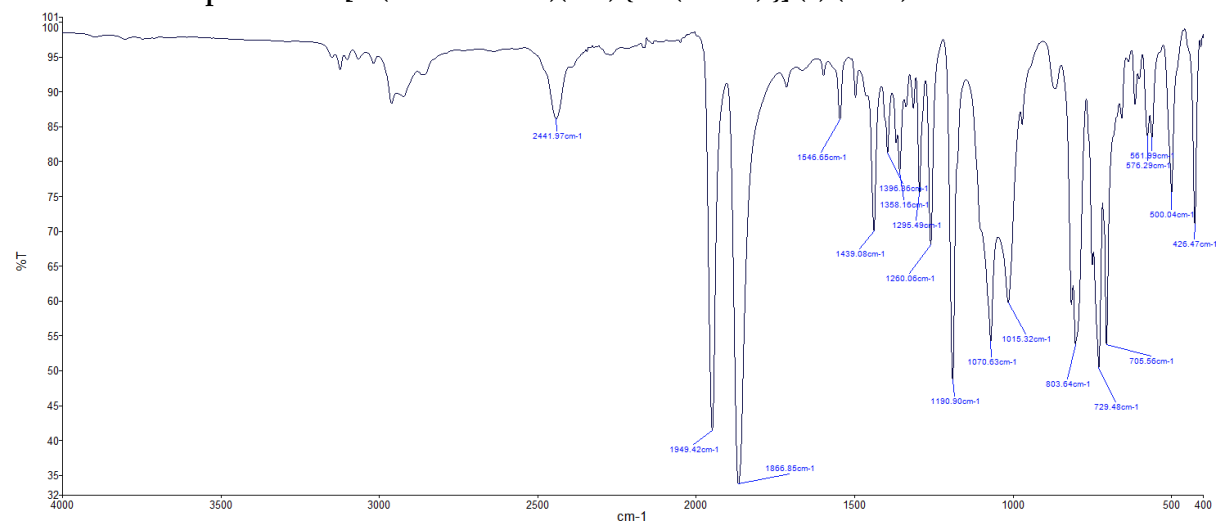

### Solution IR Spectrum of $[W(\equiv CC_6H_4Me-4)(CO)_2\{HB(ImMe)_3\}]$ (4) ( $CH_2Cl_2$ )

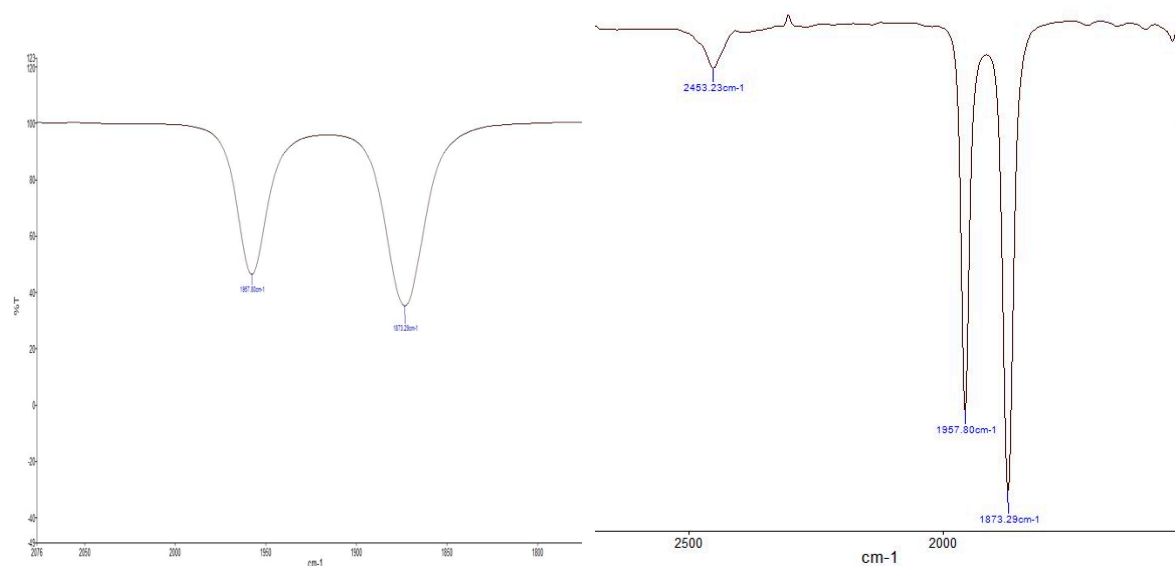

# High Resolution ESI-MS of [W(≡CC<sub>6</sub>H<sub>4</sub>Me-4)(CO)<sub>2</sub>{HB(ImMe)<sub>3</sub>}] (4) (MeOH)

## Elemental Composition Report

Page 1

### Single Mass Analysis

Tolerance = 3.0 PPM / DBE: min = -1.5, max = 18.0

Element prediction: Off

Number of isotope peaks used for i-FIT = 3

Monoisotopic Mass, Odd and Even Electron Ions

364 formula(e) evaluated with 1 results within limits (up to 50 best isotopic matches for each mass)

Elements Used:

C: 0-50 H: 0-50 11B: 0-1 N: 0-6 O: 0-2 184W: 0-1

CI-7-WCTol/AJ

SYNAPT G2-Si#NotSet

23-Sep-2022

67213

15:10:05

3547.87 (0.192) Cm (80:121)

1: TOF MS ES+

1.87e+007

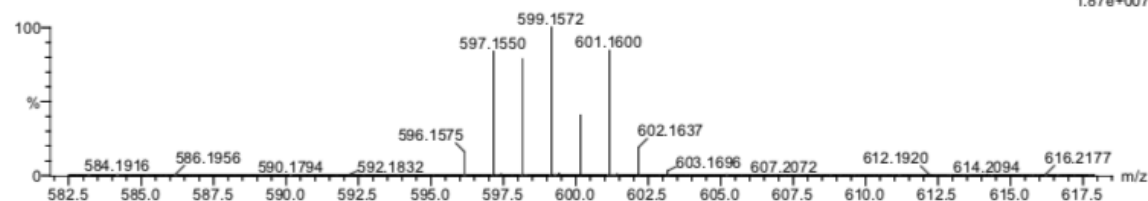

Minimum:

Maximum:

5.0

3.0

-1.5

18.0

| Mass     | Calc. Mass | mDa | PPM | DBE  | i-FIT  | Formula                |
|----------|------------|-----|-----|------|--------|------------------------|
| 599.1572 | 599.1563   | 0.9 | 1.5 | 16.0 | 2745.8 | C22 H24 11B N6 O2 184W |

CI-7-WCTol/AJ

SYNAPT G2-Si#NotSet

23-Sep-2022

67213

15:10:05

3547.87 (0.192) Cm (80:121)

1: TOF MS ES+

1.87e7

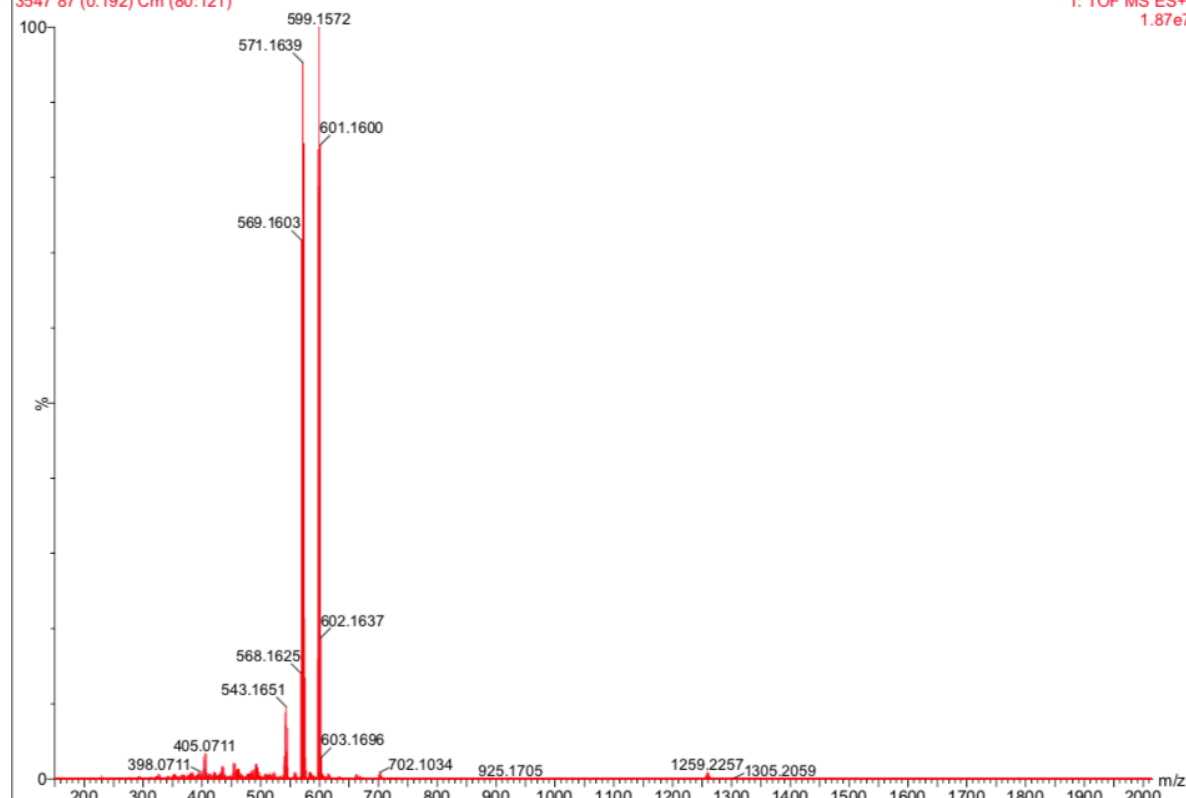

**<sup>1</sup>H NMR Spectrum of [W(≡CC<sub>6</sub>H<sub>4</sub>Me-4)(CO)<sub>2</sub>{HB(pzMe<sub>2</sub>)<sub>3</sub>}] (5) (400 MHz, CDCl<sub>3</sub>, 25 °)**

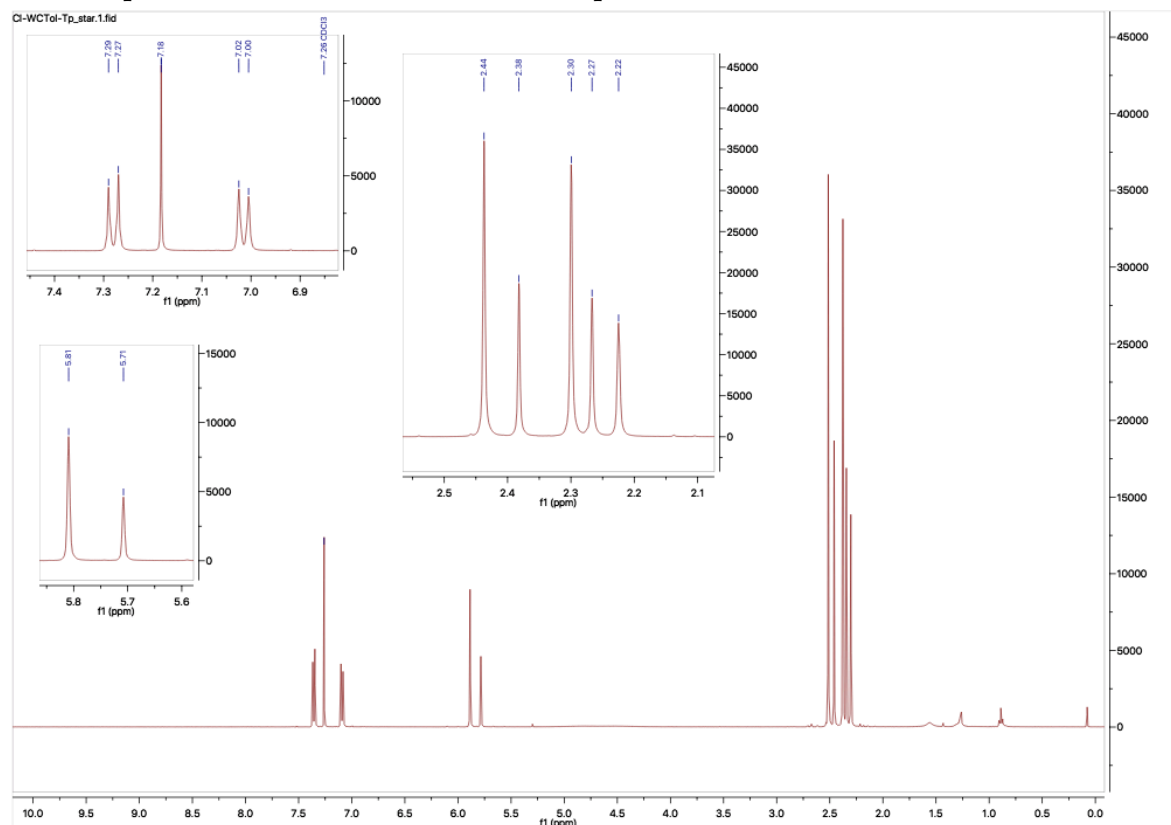<sup>13</sup>C{<sup>1</sup>H} NMR Spectrum of [W(≡CC<sub>6</sub>H<sub>4</sub>Me-4)(CO)<sub>2</sub>{HB(pzMe<sub>2</sub>)<sub>3</sub>}] (5) (201 MHz, CDCl<sub>3</sub>, 25 °)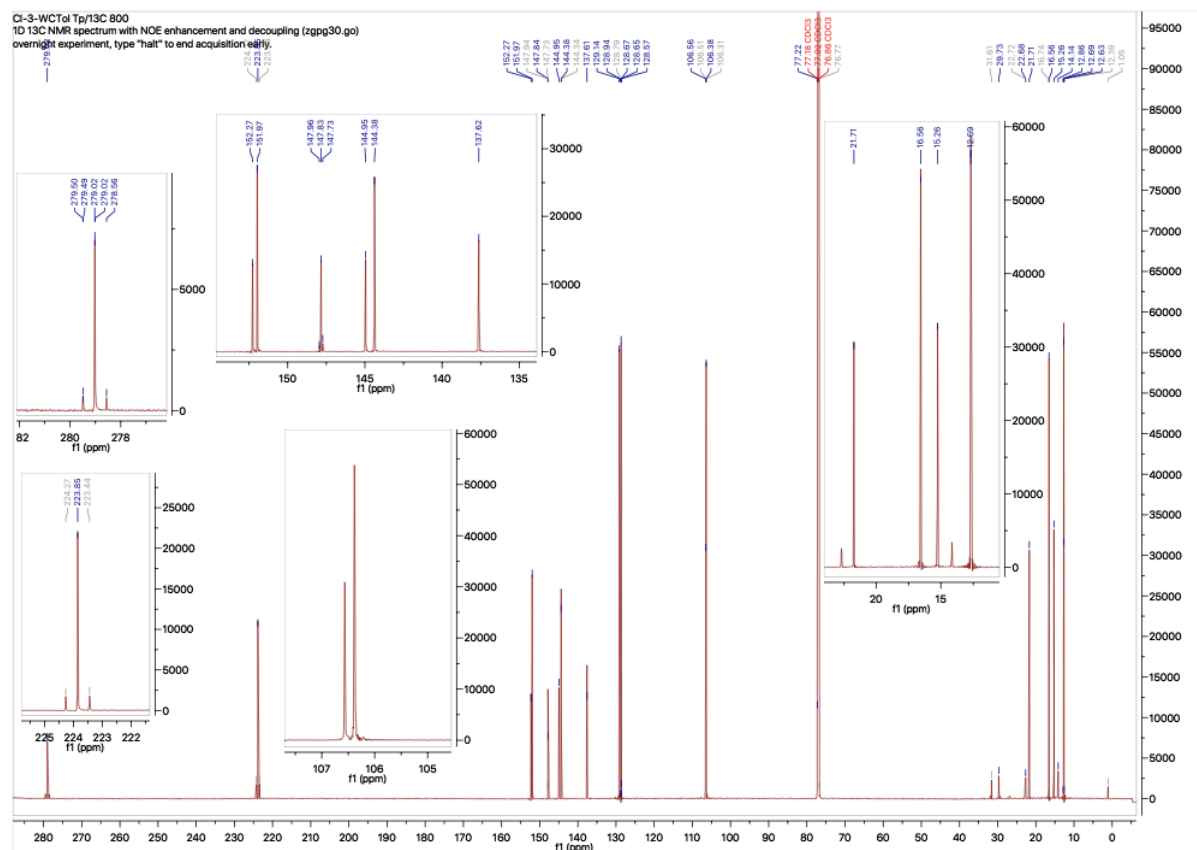



**$^{11}\text{B}\{^1\text{H}\}$  NMR Spectrum of  $[\text{W}(\equiv\text{CC}_6\text{H}_4\text{Me-4})(\text{CO})_2\{\text{HB}(\text{pzMe}_2)_3\}]$  (5) (128 MHz,  $\text{CDCl}_3$ , 25 °)**

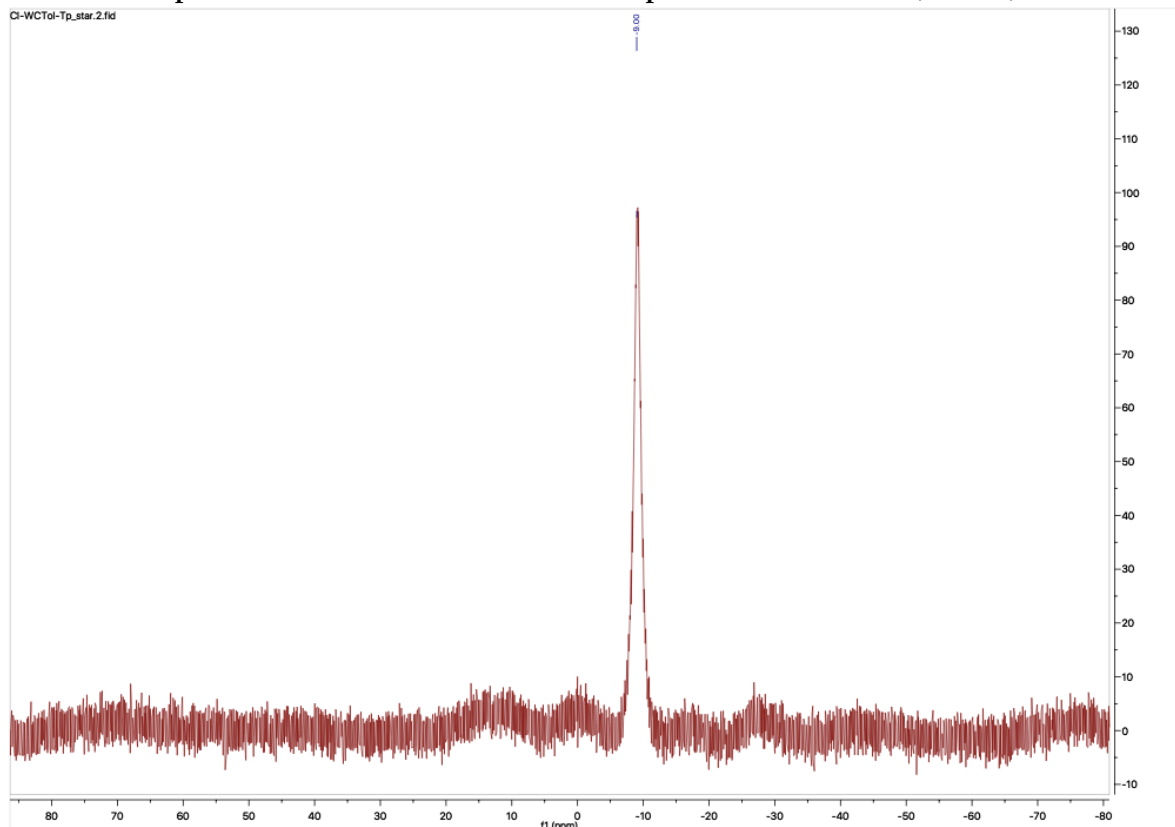

**High Resolution ESI-MS of  $[\text{W}(\equiv\text{CC}_6\text{H}_4\text{Me-4})(\text{CO})_2\{\text{HB}(\text{pzMe}_2)_3\}]$  (5) (MeOH)**

**Elemental Composition Report**

Page 1

**Single Mass Analysis**

Tolerance = 3.0 PPM / DBE: min = -1.5, max = 18.0

Element prediction: Off

Number of isotope peaks used for i-FIT = 3

Monoisotopic Mass, Odd and Even Electron Ions

351 formula(e) evaluated with 1 results within limits (up to 50 best isotopic matches for each mass)

Elements Used:

C: 0-50 H: 0-50 11B: 0-1 N: 0-6 O: 0-2 184W: 0-1

LJW-CI/AJ

SYNAPT G2-Si#NotSet

14-Oct-2022

67290

09:53:47

3782.87 (0.192) Cm (87:94)

1: TOF MS ES+

1.89e+005

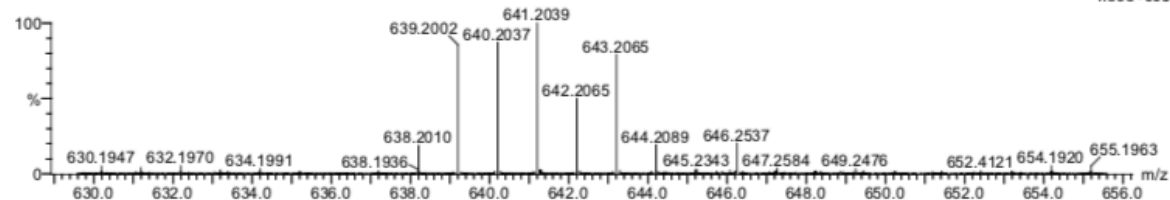

Minimum: -1.5  
Maximum: 5.0 3.0 18.0

| Mass     | Calc. Mass | mDa | PPM | DBE  | i-FIT  | Formula                                                                |
|----------|------------|-----|-----|------|--------|------------------------------------------------------------------------|
| 641.2039 | 641.2033   | 0.6 | 0.9 | 16.0 | 1750.0 | C <sub>25</sub> H <sub>30</sub> 11B N <sub>6</sub> O <sub>2</sub> 184W |

LJW-CI/AJ  
67290

SYNAPT G2-Si#NotSet

14-Oct-2022  
09:53:47

3782.87 (0.192) Cm (87:94)

1: TOF MS ES+  
4.40e5

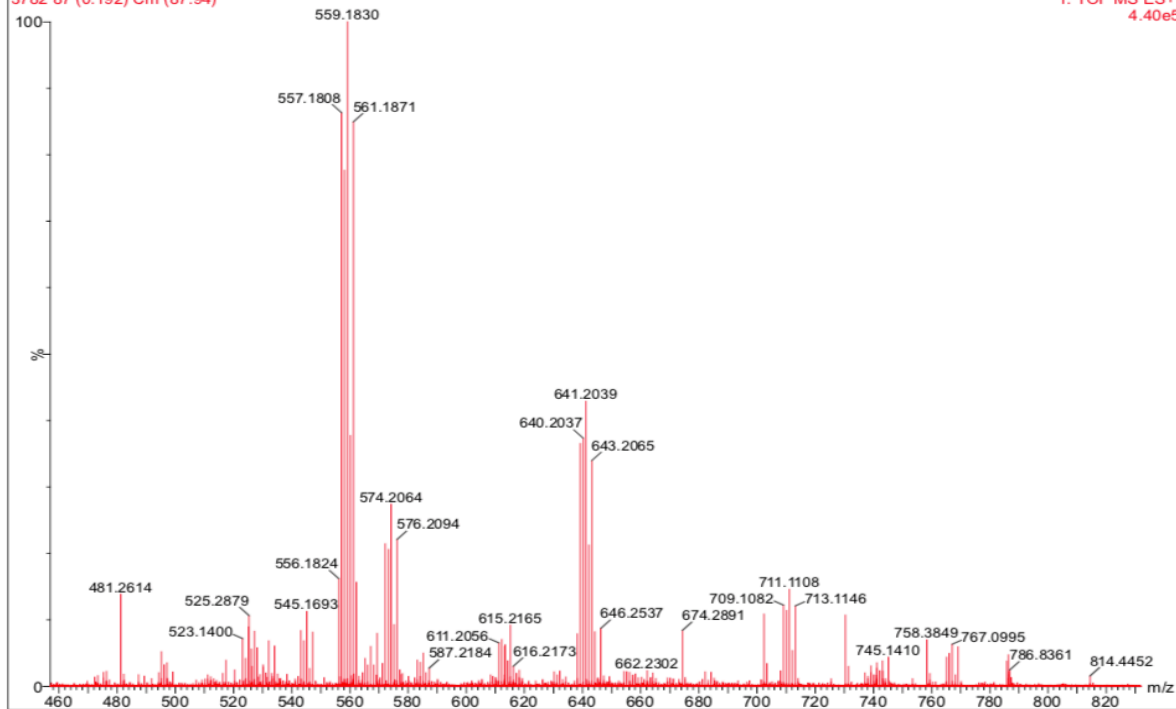

### Solid State IR Spectrum of [W(≡CC<sub>6</sub>H<sub>4</sub>Me-4)(CO)<sub>2</sub>][HB(ImMe)<sub>3</sub>] (4) (ATR)

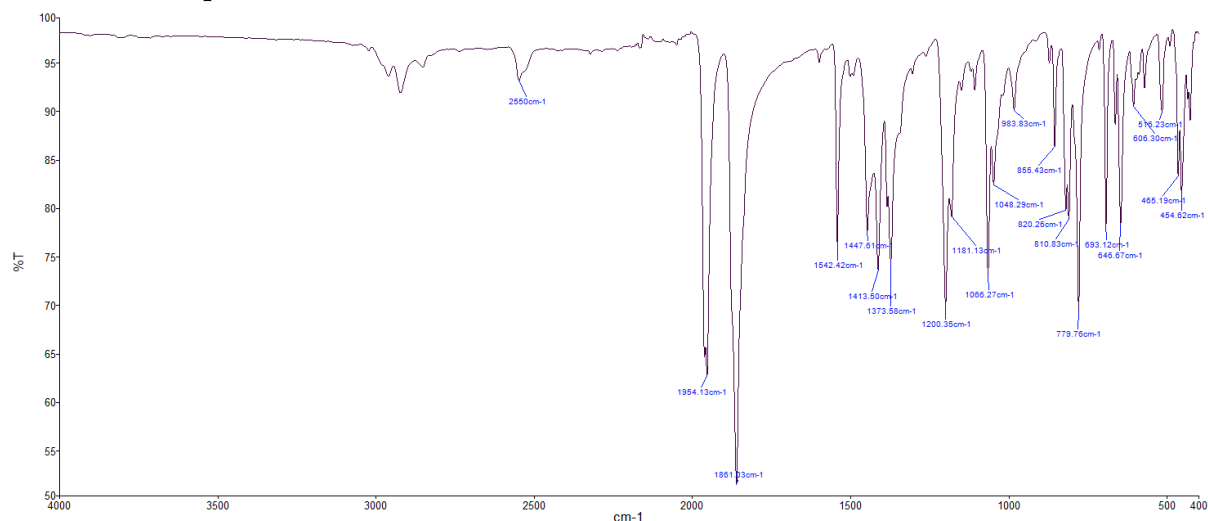

### Solution IR Spectrum of [W(≡CC<sub>6</sub>H<sub>4</sub>Me-4)(CO)<sub>2</sub>][HB(ImMe)<sub>3</sub>] (4) (CH<sub>2</sub>Cl<sub>2</sub>)

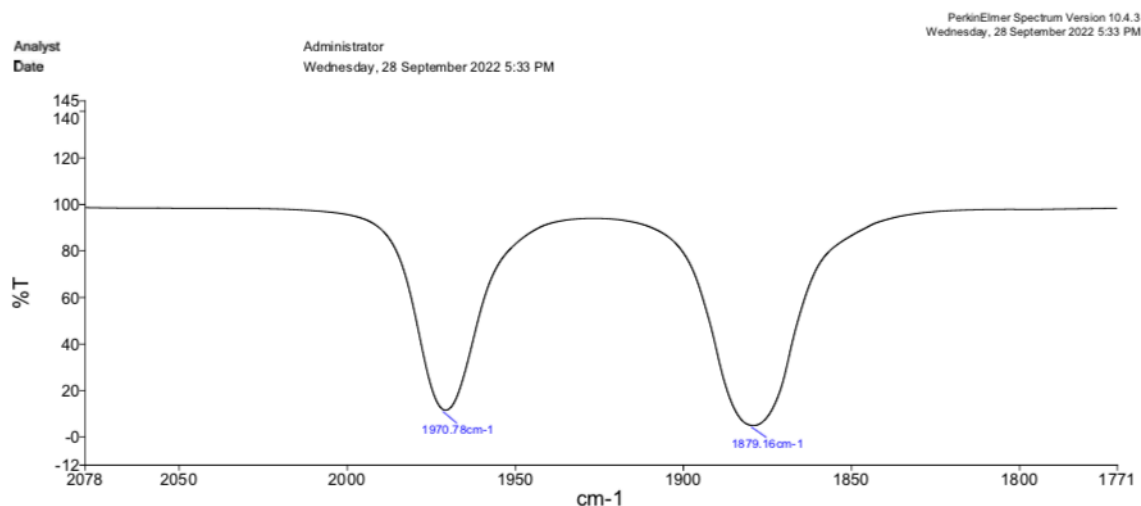

| Sample Name      | Description                                                    | Quality Checks                                                    |
|------------------|----------------------------------------------------------------|-------------------------------------------------------------------|
| CI-WCTol-Tp_star | Sample 3669 By Administrator Date Wednesday, September 28 2022 | The Quality Checks give rise to multiple warnings for the sample. |

$^1\text{H}$  NMR Spectrum of  $[\text{WAu}(\mu\text{-CC}_6\text{H}_4\text{Me-4})\text{Cl}(\text{CO})_2\{\text{HB}(\text{ImMe})_3\}]$  (6) (600 MHz,  $\text{CD}_2\text{Cl}_2$ , 25 °)

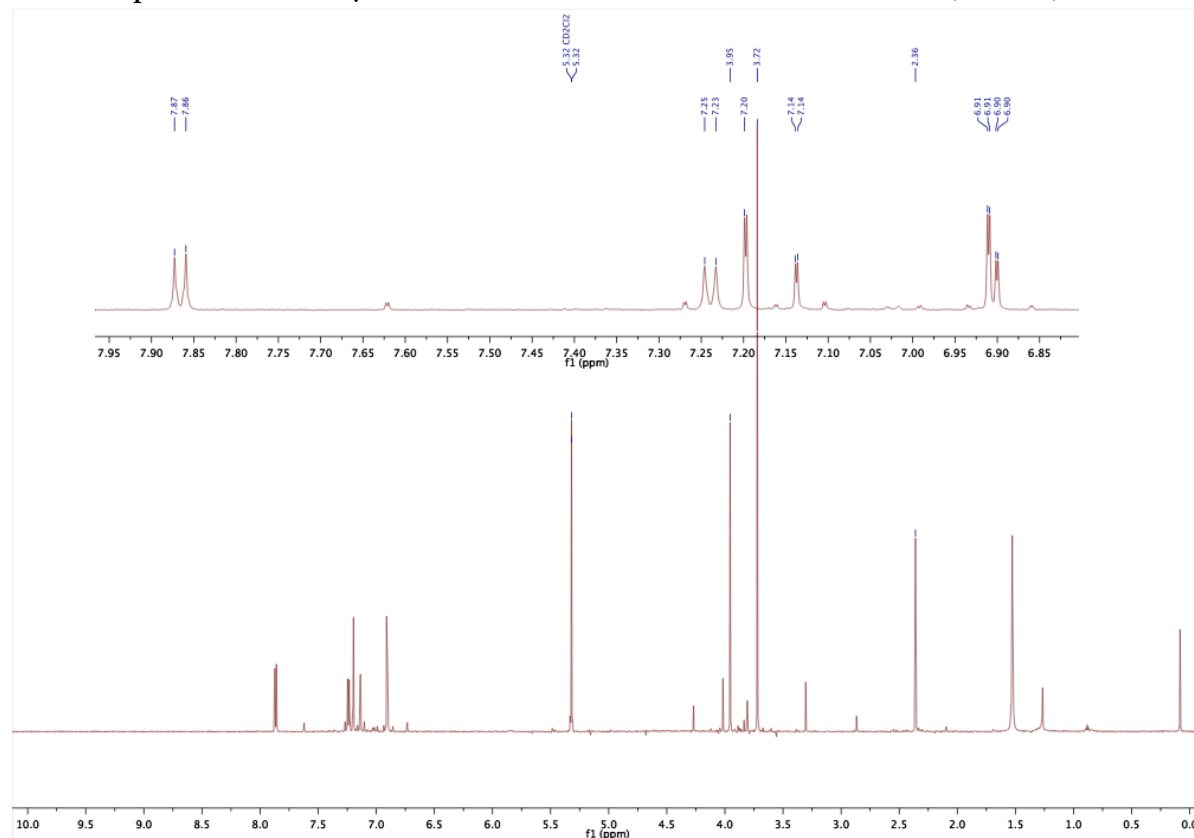

$^{13}\text{C}\{^1\text{H}\}$  NMR Spectrum of  $[\text{WAu}(\mu\text{-CC}_6\text{H}_4\text{Me-4})\text{Cl}(\text{CO})_2\{\text{HB}(\text{ImMe})_3\}]$  (6) (151 MHz,  $\text{CD}_2\text{Cl}_2$ , 25 °)

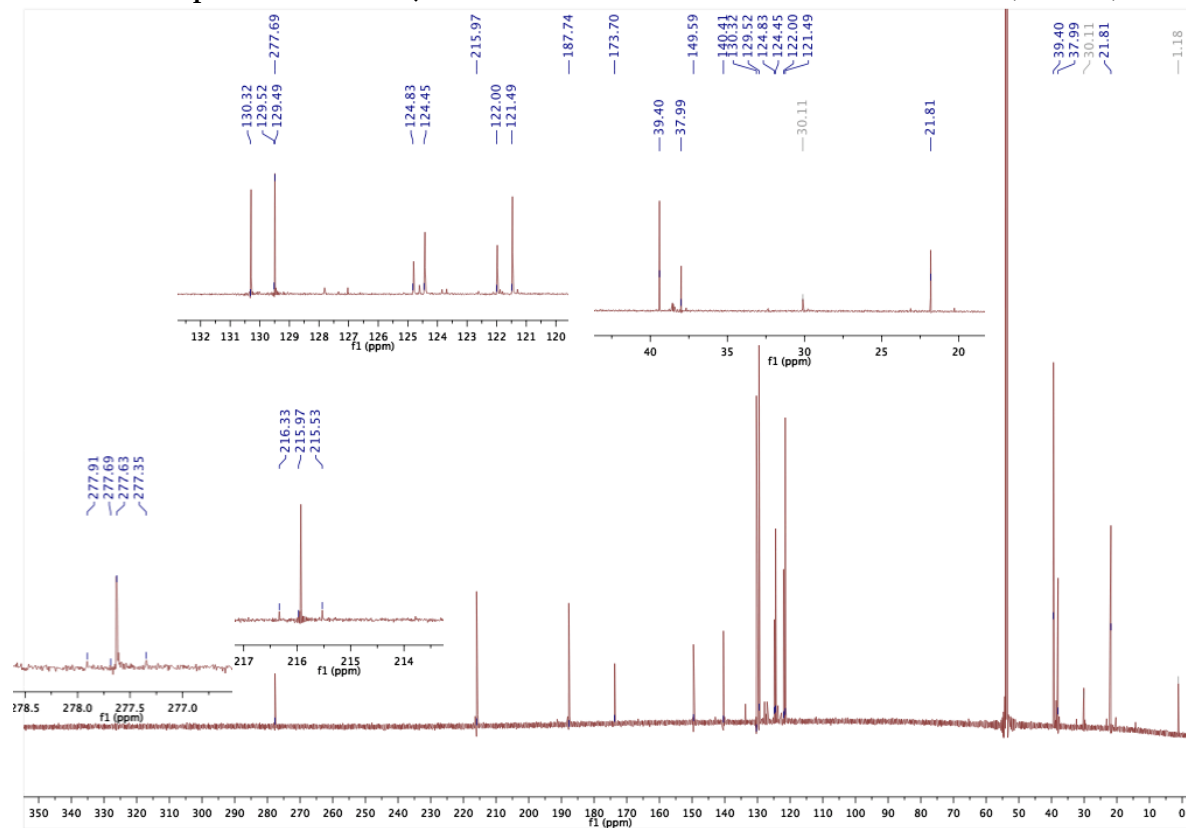

**Solid State IR Spectrum of [WAu( $\mu$ -CC<sub>6</sub>H<sub>4</sub>Me-4)Cl(CO)<sub>2</sub>{HB(ImMe)<sub>3</sub>}] (6) (ATR)**

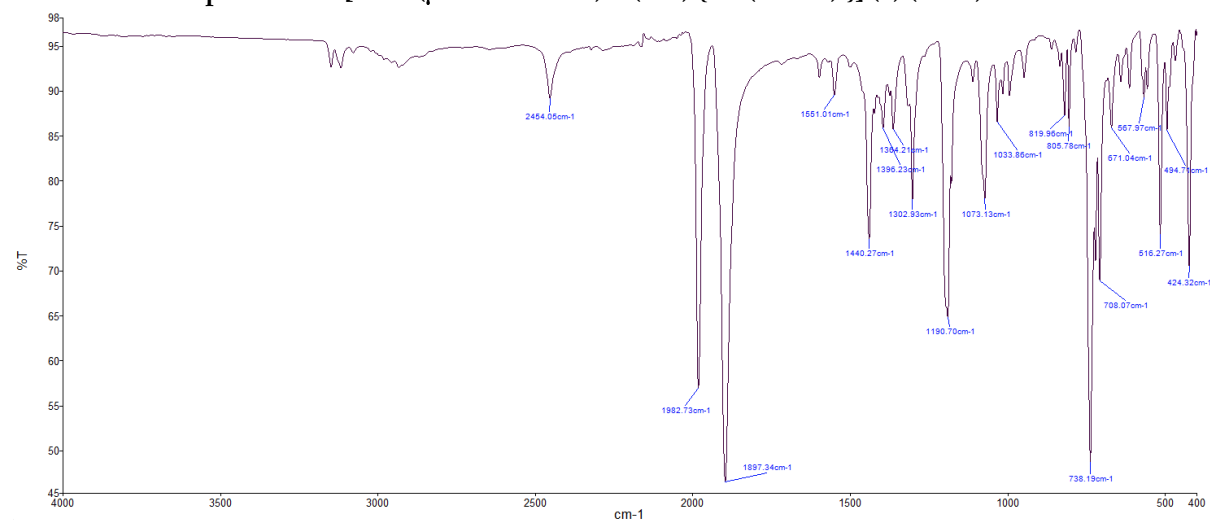

**Solution IR Spectrum of [WAu( $\mu$ -CC<sub>6</sub>H<sub>4</sub>Me-4)Cl(CO)<sub>2</sub>{HB(ImMe)<sub>3</sub>}] (6) (CH<sub>2</sub>Cl<sub>2</sub>)**

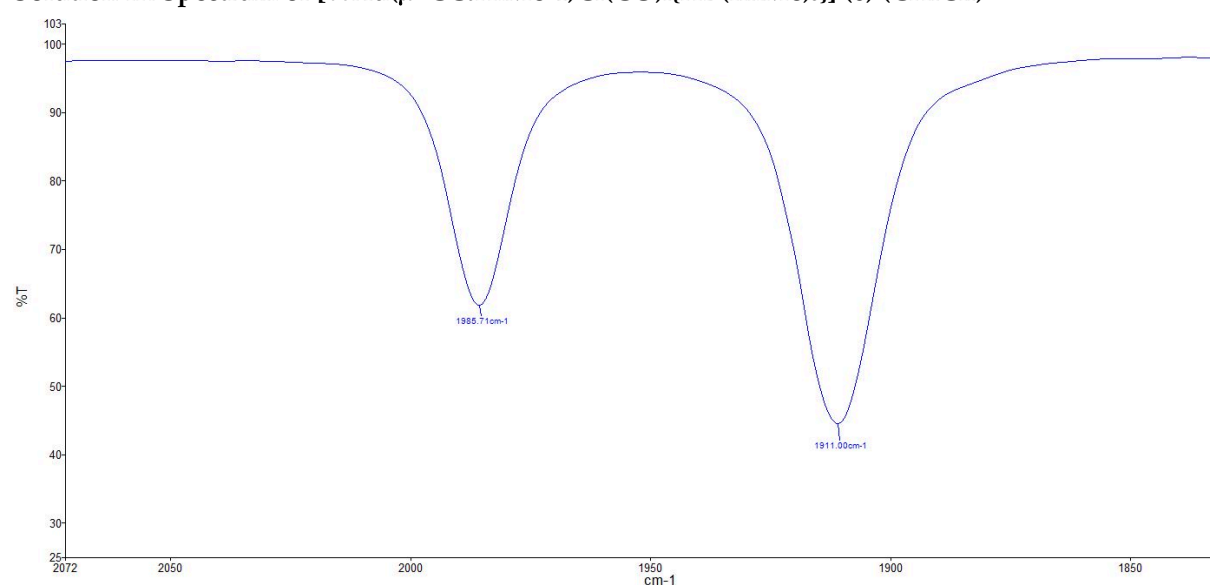

$^{11}\text{B}$  NMR Spectrum of  $[\text{WAu}(\mu\text{-CC}_6\text{H}_4\text{Me-4})\text{Cl}(\text{CO})_2\{\text{HB}(\text{ImMe})_3\}]$  (6) (128 MHz,  $\text{CD}_2\text{Cl}_2$ , 25 °)

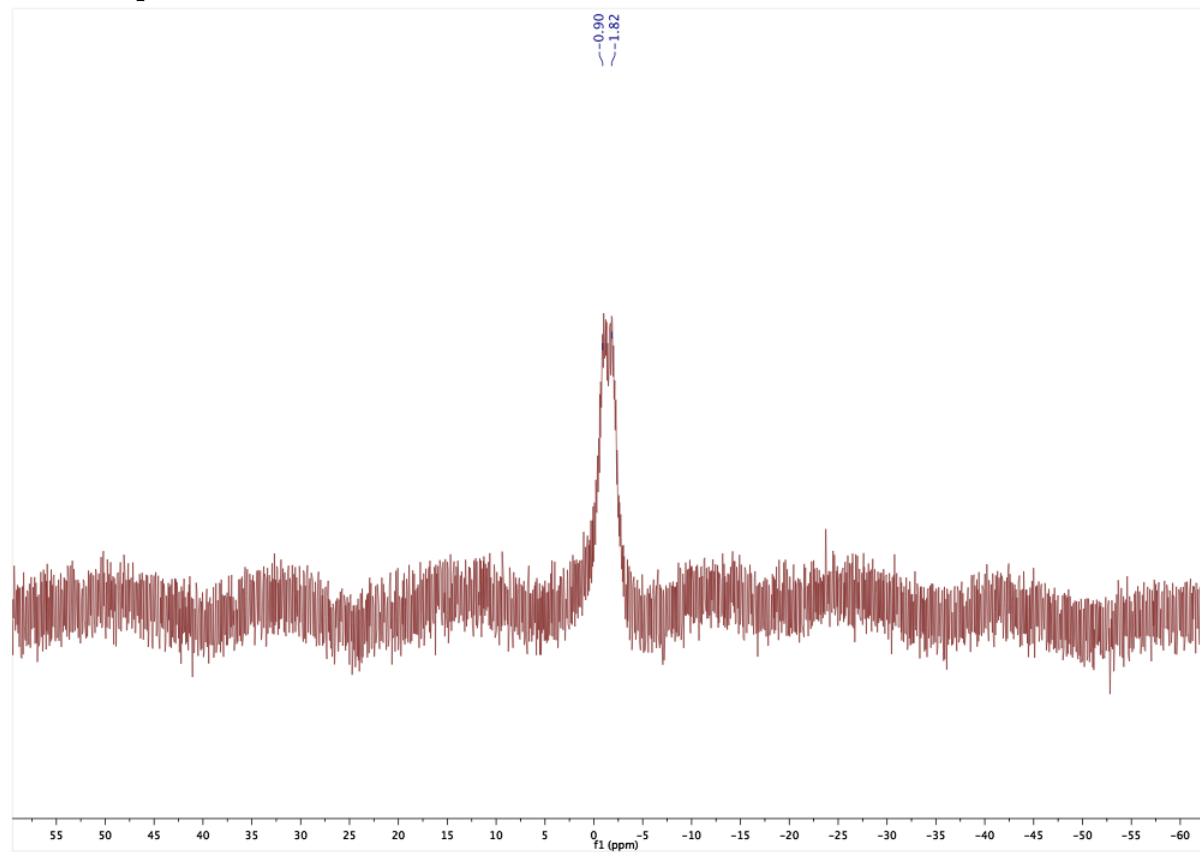

High Resolution ESI-MS of  $[\text{WAu}(\mu\text{-CC}_6\text{H}_4\text{Me-4})\text{Cl}(\text{CO})_2\{\text{HB}(\text{ImMe})_3\}]$  (6) (MeOH)

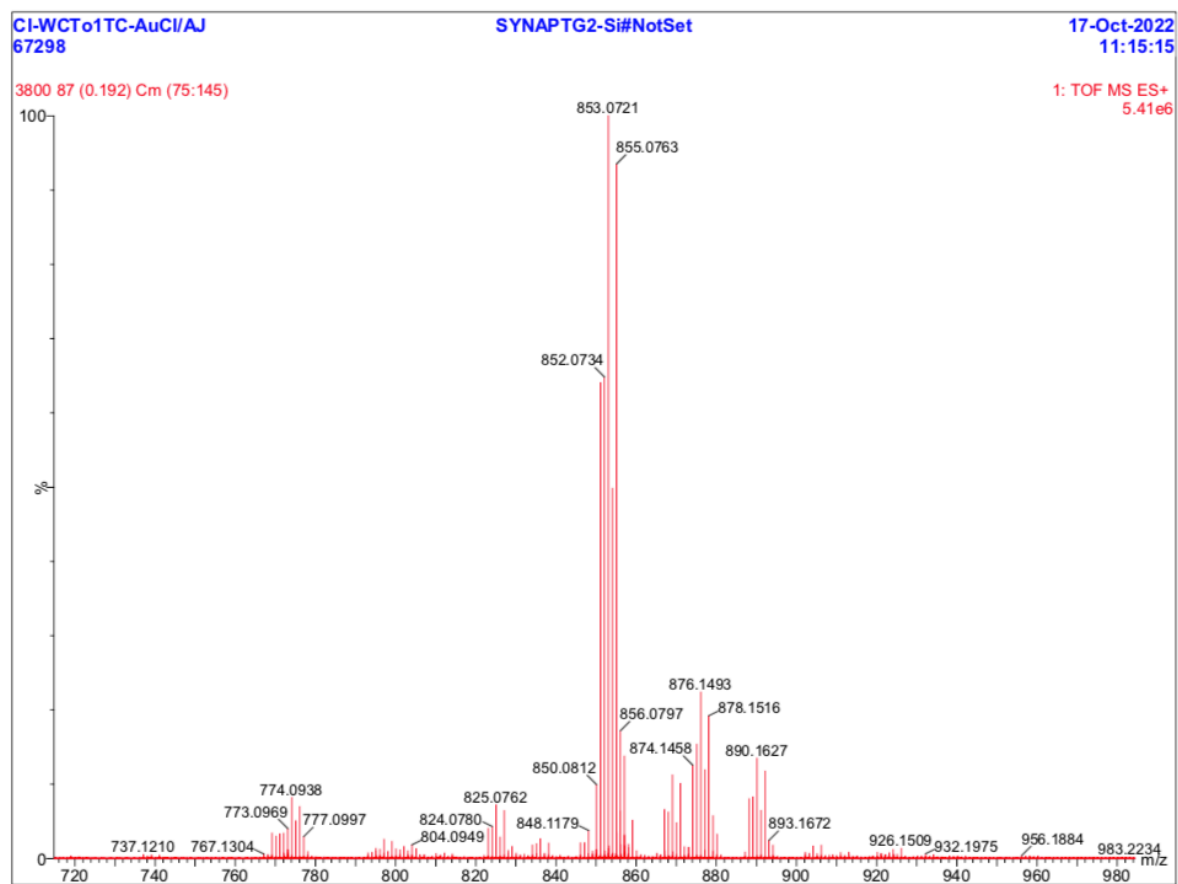

Supplement: s1 [file s1]
